1 **Pvr and downstream signaling factors are required for spreading of *Drosophila* hemocytes**  
2 **at larval wound sites**

3

4 Chang-Ru Tsai<sup>1,2\*</sup>, Alec Jacobson<sup>2†</sup>, Niki Sankoorikkal<sup>2‡</sup>, Josue D. Chirinos<sup>2§</sup>, Sirisha Burra<sup>2\*\*</sup>,  
5 Yan Wang<sup>2</sup>, Nishanth Makthal<sup>3</sup>, Muthiah Kumaraswami<sup>3</sup>, and Michael J. Galko<sup>1,2,4††</sup>

6

7 <sup>1</sup>Program in Developmental Biology, Baylor College of Medicine, Houston, Texas, United States

8 <sup>2</sup>Department of Genetics, University of Texas MD Anderson Cancer Center, Houston, Texas,  
9 United States

10 <sup>3</sup>Department of Pathology and Genomic Medicine, Houston Methodist Hospital, Houston, Texas,  
11 United States

12 <sup>4</sup>Genetics & Epigenetics Graduate Program, University of Texas MD Anderson Cancer Center,  
13 Houston, Texas, United States

14 \*Present address: Department of Molecular Physiology and Biophysics, Baylor College of  
15 Medicine, Texas, United States

16 †Present address: Carleton College, Northfield, Minnesota, United States

17 ‡Present address: School of Medicine, Texas Tech University Health Sciences Center, Lubbock,  
18 Texas, United States

19 §Present address: Harvard Medical School, Boston, Massachusetts, United States

20 \*\*Present address: Department of Melanoma Medical Oncology, University of Texas MD  
21 Anderson Cancer Center, Houston, Texas, United States

22

23 Running title: Pvr and wound-induced hemocyte spreading

24

25

26 ††Author for correspondence:

27 Michael J. Galko, Ph.D.

28 Department of Genetics- Unit 1010

29 University of Texas MD Anderson Cancer Center

30 1515 Holcombe Blvd, Houston, TX 77030

31 Office: 713-792-9182

32 Email: [mjgalko@mdanderson.org](mailto:mjgalko@mdanderson.org)

33

34 **Key words:** inflammation, larvae, cell-spreading, Pvr, hemocytes, *Drosophila*, wound closure

35



36 **Abstract**

37 Tissue injury is typically accompanied by inflammation. In *Drosophila melanogaster*, wound-  
38 induced inflammation involves adhesive capture of hemocytes at the wound surface followed by  
39 hemocyte spreading to assume a flat, lamellar morphology. The factors that mediate this cell  
40 spreading at the wound site are not known. Here, we discover a role for the Platelet-derived  
41 growth factor (PDGF)/ Vascular endothelial growth factor (VEGF)-related receptor (Pvr) and its  
42 ligand, Pvf1, in blood cell spreading at the wound site. Pvr and Pvf1 are required for *spreading*  
43 *in vivo* and in an *in vitro* spreading assay where spreading can be directly induced by Pvf1  
44 application or by constitutive Pvr activation. In an effort to identify factors that act downstream  
45 of Pvr, we performed a genetic screen in which select candidates were tested to determine if they  
46 could suppress the lethality of Pvr overexpression in the larval epidermis. Some of the  
47 suppressors identified are required for epidermal wound closure, another Pvr-mediated wound  
48 response, some are required for hemocyte spreading *in vitro*, and some are required for both. One  
49 of the downstream factors, Mask, is also required for efficient wound-induced hemocyte  
50 spreading *in vivo*. Our data reveals that Pvr signaling is required for wound responses in  
51 hemocytes (cell spreading) and defines distinct downstream signaling factors that are required  
52 for either epidermal wound closure or hemocyte spreading.

53

## 54 **Introduction**

55 *Drosophila* larvae have emerged as a useful system to study tissue repair responses (Tsai  
56 et al. 2018), including wound closure (WC) (Baek et al. 2010; Galko and Krasnow 2004; Kakanj  
57 et al. 2016), epidermal cell-cell fusion (Lee et al. 2017; Wang et al. 2015) and basement  
58 membrane dynamics (Ramos-Lewis et al. 2018). Following injury, larval barrier epithelial cells  
59 at the wound-edge locally detach from the apical cuticle and migrate into the wound gap. This  
60 process requires both JNK signaling (Galko and Krasnow 2004; Lee et al. 2019; Lesch et al.  
61 2010) and Pvr signaling (Wu et al. 2009). The latter is required in some manner for epithelial  
62 extension into the wound site, though it has been difficult to identify downstream genes of this  
63 pathway given a lack of pathway reporters that function well *in vivo* during the larval stage.

64 *Drosophila* is also a good system for studying damage-induced inflammatory responses  
65 (Brock et al. 2008; Stramer and Dionne 2014). Hemocyte responses to wounding in *Drosophila*  
66 are remarkably stage-specific. The recruitment of hemocytes to wounds during the non-  
67 locomotory embryonic (Stramer et al. 2005) and pupal stages (Moreira et al. 2011) is primarily  
68 through directed cell migration of hemocytes. These migrations require hydrogen peroxide  
69 (Moreira et al. 2010) and likely other cues (Weavers et al. 2016). Larvae, which are a locomotory  
70 foraging stage that follows embryogenesis and precedes pupariation and, have a different  
71 mechanism of recruiting hemocytes to damaged tissue. In larvae, circulating hemocytes patrol  
72 the open body cavity and adhere to damaged tissue if they encounter it (Babcock et al. 2008).  
73 Once at the wound, attached hemocytes spread, change from an approximately spherical to a  
74 flattened fan-like morphology, and phagocytose cell debris. At the larval stage, even hemocytes  
75 close to the wound do not respond to it through directed migration (Babcock et al. 2008). Some  
76 hints about the molecules required for blood cell attachment have been gleaned from other insect

77 species (Levin et al. 2005; Nardi et al. 2006) and from vertebrates (Eming et al. 2007). Likewise,  
78 some studies of *Drosophila* cell morphology have been performed in hemocyte-like cells *in vitro*  
79 (D'Ambrosio and Vale 2010; Kiger et al. 2003) and even in response to wounding *in vivo*  
80 (Kadandale et al. 2010). However, the molecules required for wound-induced spreading *in vivo*  
81 and their relationship to *in vitro* observations remain unclear.

82 Pvr is a *Drosophila* receptor tyrosine kinase (RTK) related to the vertebrate VEGF  
83 receptor (Cho et al. 2002; Heino et al. 2001). Pvr controls a variety of developmental signaling  
84 events including hemocyte differentiation (Mondal et al. 2014), migration (Cho et al. 2002;  
85 Wood et al. 2006), and survival (Bruckner et al. 2004; Munier et al. 2002; Zettervall et al. 2004).  
86 Pvr is also required for epithelial developmental migrations (Garlena et al. 2015; Harris et al.  
87 2007; Ishimaru et al. 2004; McDonald et al. 2003) and for epidermal WC at the larval stage (Wu  
88 et al. 2009). Because Pvr is an RTK it presumably connects to a fairly canonical RTK signaling  
89 pathway downstream and some studies have identified downstream players in certain contexts  
90 (Fernández-Espartero et al. 2013; Jékely et al. 2005; McDonald et al. 2003). Notably, however,  
91 reliable reporters for monitoring pathway activity *in vivo* have been difficult to come by for this  
92 pathway. An alternative approach to finding pathway components, one with prior success for  
93 analyzing RTK pathways is genetic modifier screening (Smith et al. 2002; Sullivan and Rubin  
94 2002). Here, we took advantage of the lethality of Pvr overexpression in the larval epidermis  
95 (Wu et al. 2009) to design a suppressor screen that could, in theory, identify downstream  
96 signaling components in this tissue. We then cross-checked the suppressors identified by the  
97 screen to see if they were required for larval epidermal WC or for hemocyte spreading at wound  
98 sites. This strategy revealed both shared and distinct downstream components for Pvr signaling  
99 in mediating epidermal WC and hemocyte spreading.

100

## 101 **Materials and Methods**

### 102 **Genetics**

103 *Drosophila* were reared on standard cornmeal medium under a 12 h light-dark cycle. All crosses  
104 were cultured at 25 °C unless indicated. *w<sup>1118</sup>* was used as a control strain. *Pvr<sup>c02859</sup>* is a  
105 hypomorphic allele (Cho et al. 2002; Wu et al. 2009). *Pvr<sup>M104181</sup>* (Venken et al. 2011), referred to  
106 as *Pvr<sup>null</sup>*, contains a splice acceptor and a stop cassette in an early Pvr intron which leads to  
107 truncation. *Pvf1<sup>EP1624</sup>*, here referred to as *Pvf1<sup>null</sup>*, is a null allele (Cho et al. 2002; Wu et al.  
108 2009). *Pvf2<sup>c06947</sup>*, here referred to as *Pvf2<sup>hypo</sup>*, is a hypomorphic allele (CHO *et al.* 2002).  
109 *Pvf3<sup>M04168</sup>*, here referred to as *Pvf3<sup>null</sup>*, contains a splice acceptor and a stop cassette in an early  
110 Pvf3 intron which leads to truncation (Venken et al. 2011).

111 The GAL4/UAS system was used to drive tissue-specific gene expression of transgenes  
112 under UAS control (Brand and Perrimon 1993). For larval hemocytes, *hmlΔ-Gal4* was used  
113 (Sinenko and Mathey-Prevot 2004); for the embryonic and larval epidermis, *e22c-Gal4* was used  
114 (Lawrence et al. 1995); for the larval epidermis, *A58-Gal4* was used (Galko and Krasnow 2004).  
115 To increase Pvr expression or activation in specific tissues, various Gal4 drivers were crossed to  
116 either *UAS-Pvr* or *UAS-λPvr* (Duchek et al. 2001). For the hemocyte spreading assay, we used  
117 *hmlΔ-Gal4*, *UAS-GFP* or *hmlΔ-Gal4* (Sinenko and Mathey-Prevot 2004), *UAS-lifect-GFP*  
118 (Hatan et al. 2011). For visualizing WC, we used *e22c-Gal4*, *UAS-src-GFP*, *UAS-DsRed2-Nuc*  
119 or *A58-Gal4*, *UAS-src-GFP*, *UAS-DsRed2Nuc* (Lesch et al. 2010). *e22c-Gal4*, *UAS-src-GFP*,  
120 *UAS-DsRed2Nuc*; *tubP-gal80<sup>ts</sup>* was used where temporal control of the Gal4/UAS system was  
121 needed (McGuire et al. 2004).

122 *UAS-RNAi* lines employed were: From Vienna Drosophila Research Center (VDRC)  
123 (Dietzl et al. 2007): *KK108550 (MKK3<sup>RNAi#1</sup>)*, *GD7546 (MKK3<sup>RNAi#2</sup>)*, *KK100471 (CG1227<sup>RNAi</sup>)*,  
124 *GDI4375 (Pvr<sup>RNAi#1</sup>)*. Note: lines are listed as- construct ID (GeneX<sup>RNAi</sup>). *UAS-RNAi* lines from  
125 the TRiP Bloomington collection (Ni et al. 2011) were: *JF01355 (Luciferase<sup>RNAi</sup>)*, *JF02478*  
126 (*Ras<sup>RNAi#2</sup>*), *HMS01294 (Ras<sup>RNAi#3</sup>)*, *HMS01979 (Vav<sup>RNAi</sup>)*, *HMS00173 (Erk<sup>RNAi</sup>)*, *HMS05002*  
127 (*MKK3<sup>RNAi#3</sup>*), *JF02770 (PI3K92E<sup>RNAi</sup>)*, *HMS00007 (Akt<sup>RNAi</sup>)*, *GL00156 (Tor<sup>RNAi#1</sup>)*, *HMS00904*  
128 (*Tor<sup>RNAi#2</sup>*), *JF02717 (drk<sup>RNAi</sup>)*, *HMS01045 (mask<sup>RNAi</sup>)*, *JF01792 (Ck1α<sup>RNAi#1</sup>)*, *GL0021*  
129 (*Ck1α<sup>RNAi#2</sup>*), *GL00250 (GckIII<sup>RNAi</sup>)*. *UAS-RNAi* lines from NIG-Fly  
130 (<http://www.shigen.nig.ac.jp/fly/nigfly/index.jsp>) were: *9375R-1 (Ras85D<sup>RNAi</sup>)*, *7717R-1*  
131 (*MEKK1<sup>RNAi</sup>*), *1587R-1 (Crk<sup>RNAi</sup>)*, *6313R-2 (mask<sup>RNAi#2</sup>)*, *8222R-3 (Pvr<sup>RNAi#2</sup>)*.

132 Other transgenic lines from Bloomington Stock Center: #9490, *w\**; *TM6B*,  
133 *P{w[+mC]=tubP-GAL80}OV3*, *Tb<sup>1</sup>/TM3*, *Sb<sup>1</sup>* (Balancer Stock containing Gal80). #8529, *w\**;  
134 *P{w[+mC]=UAS-lacZ.Exel}2* (used as UAS control). #64196, *w\**; *P{UAS-Ras85D.V12}2*  
135 (constitutively active form of Ras85D)(Lee et al. 1996). #19989, *P{y[+t7.7]=Mae-*  
136 *UAS.6.11}lic[GG01785]/FM7c* (overexpresses MKK3) (Beinert et al. 2004). #59005, *P{UAS-*  
137 *p38b.DN}1* (dominant negative form of *p38b*) (Adachi-Yamada et al. 1999). #5788, *P{UAS-*  
138 *Ras85D.K}5-1* (wild type Ras85D) (Karim and Rubin 1998). #4845, *P{UAS-Ras85D.N17}TL1*  
139 (dominate negative form of Ras85D) (Lee et al. 1996). #30139, *w[1118]*; *P{w[+mC]=Hml-*  
140 *GAL4.Delta}2 (hmlΔ-Gal4)*. #30140, *w[1118]*; *P{w[+mC]=Hml-GAL4.Delta}2*,  
141 *P{w[+mC]=UAS-2xEGFP}AH2 (hmlΔ-Gal4, UAS-GFP)* (Sinenko and Mathey-Prevot 2004).  
142 #35544, *y[1] w[\*]*; *P{y[+t\*] w[+mC]=UAS-Lifeact-GFP}VIE-260B (UAS-lifeact-GFP)* (Hatan  
143 et al. 2011).

## 144 **Scanning Electron Microscopy (SEM)**

145 Dissected larval epidermis were fixed in 3% glutaraldehyde/2% paraformaldehyde with 2.5%  
146 DMSO in 0.2 M sodium phosphate buffer for 15 min. Samples were then dehydrated in graded  
147 ethanol concentrations and hexamethyldisilazane. Next, processed samples were mounted on to  
148 double-stick carbon tabs (Ted Pella, Inc., Redding, CA), which have been previously mounted on  
149 to glass microscope slides. The samples were then coated under vacuum using a Balzer MED  
150 010 evaporator (Technotrade International, Manchester, NH) with platinum alloy for a thickness  
151 of 25 nm, then immediately flash carbon coated under vacuum. The samples were transferred to  
152 a desiccator for examination at a later date. Samples were examined/imaged in a JSM-5910  
153 scanning electron microscope (JEOL, USA, Inc., Peabody, MA) at an accelerating voltage of 5  
154 kV. To quantify the SEM results, three to five (350X) images of each wound and three to twelve  
155 animals for each genotype were collected. These images were given to four or more persons to  
156 blindly score the hemocyte spreading phenotype. Percentages of hemocytes at the wound sites  
157 showing spreading morphology were binned into 0%, 25%, 50%, 75% and 100%. Scoring results  
158 of each image from different persons were averaged. Multiple images from the same animals  
159 were then averaged to obtain a “spreading index”.

## 160 **Pvf1 enrichment**

161 The plasmid containing Pvf1d was transformed into BL21DE3 *E. coli* cells for overexpression.  
162 Cells were grown in Luria-Bertani broth at 37°C to an A<sub>600</sub> density of 0.6 and Pvf1d (truncated  
163 version of Pvf1 containing only the VEGF-like domain) overexpression was achieved by  
164 induction with 1 mM Isopropyl β-D-ThioGalactoside (IPTG) for 3 hours. Cell pellets were  
165 harvested and resuspended in lysis buffer containing 20 mM Tris pH8.0, 0.1 M NaCl, 5%

166 glycerol, 1 mM Ethylene diamine tetra-acetic acid (EDTA), and 0.1 M Dithiothreitol (DTT).  
167 Cells were lysed using a French press and the inclusion bodies containing the overexpressed  
168 Pvf1d were collected by centrifugation at 15000 rpm for 30 minutes. Inclusion bodies were  
169 washed with the lysis buffer and stored in aliquots at -80°C. Approximately 1 gram of inclusion  
170 body was resuspended in lysis buffer containing 8 M Urea and dialysed overnight against the  
171 same buffer. Refolding of Pvf1d was achieved by overnight dialysis against buffer containing 50  
172 mM N-cyclohexyl-3-aminopropanesulfonic acid (CAPS) pH 10.5, 50 mM NaCl, 5% glycerol,  
173 and 5 mM cysteine. Prior to dialysis, protein concentration was adjusted to 0.2 mg/ml and the  
174 dialysis step was repeated two more times. Subsequently, protein was cleared of precipitates by  
175 centrifugation and purified into a storage buffer containing 20 mM CAPS pH 10.5, 50 mM NaCl  
176 and 2.5% glycerol by size exclusion chromatography.

177

### 178 ***In vitro* hemocyte spreading assay**

179 Hemocytes were isolated from wandering third instar larvae (genotype: *w;hmlA-Gal4,UAS-GFP*  
180 *+/- UAS-RNAi transgene*) using a protocol modified from (Kadandale et al. 2010).  
181 Approximately 150 mg of larvae (~ 100) were collected into a cell strainer (70 µm pore size) and  
182 washed once in Phosphate Buffered Saline (PBS). The rinsed larvae were crushed within the cell  
183 strainer in a 35 mm sterile cell culture dish with the cap-end of an eppendorf tube. The crushate  
184 containing hemocytes was filtered into the 35 mm dish by washing the crushed larvae twice with  
185 500 µl of PBS. The hemocyte-containing filtrate was collected into a 1.5 ml eppendorf tube and  
186 was centrifuged for 1 min at 1000 rpm to remove particulates. The supernatant was re-  
187 centrifuged at 2000 rpm for 2 min to collect hemocytes. The hemocyte-containing pellet was  
188 resuspended in 500 µl of room temperature Schneider's *Drosophila* culture medium (GIBCO,

189 Invitrogen).  $\sim 1 \times 10^5$  cells suspended in the culture media described above were plated onto  
190 coverslips (Corning) that were placed in a sterile 24 well culture well (Corning). After plating, 1  
191  $\mu\text{l}$  of 44 ng/ $\mu\text{l}$  recombinant Pvf1 protein was added to the culture and the cells were treated for 1  
192 hr at 25 °C. 1  $\mu\text{l}$  of 1X PBS was added to control cells instead of Pvf1 and were cultured for 1 hr  
193 at 25 °C. Phalloidin staining: After 1 hr of Pvf1 or control treatment, the cells were washed once  
194 with PBS and fixed for ten min with 4% paraformaldehyde before washing three times with PBS.  
195 The cells were permeabilized with 0.1% Triton X-100 (TX-100) in PBS (washing buffer) for 10  
196 min and then incubated in blocking buffer (3% BSA, 0.1% TX-100 prepared in 1X PBS) for 30  
197 min at room temperature. The cells were stained overnight at 4 °C with a 1:50 dilution of  
198 phalloidin-Alexa 546 (Invitrogen) made in blocking buffer followed by three washes each of 5  
199 min. After washing, the coverslips containing phalloidin-stained cells were lifted off the well and  
200 mounted on to a glass slide (Fisher Scientific) using a drop (around 3  $\mu\text{l}$ ) of mounting media  
201 (Vectashield, Vector Laboratories). The coverslips were sealed to the glass slide with clear nail  
202 polish and stored at 4 °C until imaged. Anti-Phospho-Pvr antibody staining: Phospho-Pvr (pPvr)  
203 antibody (monoclonal antibody) that detects the phosphorylation of Pvr at Tyr 1426 (Janssens et  
204 al. 2010) was a generous gift from Dr. P. Rørth (Institute of Molecular and Cell Biology,  
205 Proteos, Singapore). Hemocytes were isolated and processed as mentioned above until the  
206 completion of blocking. Staining was performed with a 1:5 dilution of anti-pPvr (diluted in  
207 blocking buffer) at 4 °C overnight. The secondary antibody was Goat anti-mouse DyLight 649  
208 (Jackson ImmunoResearch Laboratories) which was bound for 1 hr at room temperature before  
209 washing and mounting onto glass slides as described above.



## 210 **Hemocyte spreading screen**

211 A more streamlined version of the above spreading assay was developed for the purposes of  
212 screening. In this protocol, select *UAS-RNAi* lines were crossed with the screening stock (*hmlΔ-  
213 Gal4, UAS-lifeact-GFP, UAS-λPvr*) at 25°C. For each cross, ~10 mid-3<sup>rd</sup> instar larvae (5 days after  
214 egg lay) carrying the Gal4 driver, *UAS-lifeact-GFP, UAS-λPvr (UAS-Pvr<sup>CA</sup>)* and the candidate  
215 *UAS-RNAi* transgene were selected and placed in a glass dissection well containing PBS. Larvae  
216 were washed with 70% ethanol and PBS and then briefly kept in 300 μl of PBS. Hemocytes were  
217 released from the larvae by nicking their posterior ends with dissection scissors (Fine Science  
218 Tools, #15000-02). Collected hemocytes were transferred to an ice-cold low-retention tube  
219 (Fisher, #02-681-331). Collected hemocytes were seeded into an 8-well chamber slide (Millipore,  
220 PEZGS0816) and allowed to spread for one hour at room temperature. After spreading, samples  
221 were fixed with 3.7% formaldehyde for five minutes, washed with PBS, and mounted in  
222 Vectashield before imaging with Olympus FV1000 Confocal microscope with Fluoview software  
223 and 60x oil lens. ImageJ was used to manually measure the longest axis of individual hemocytes.  
224 Overlapping hemocytes were excluded from measurement to avoid potential interference between  
225 cells. To measure the hemocyte size before spreading, hemocytes were fixed (as above) right after  
226 isolation and washed with PBS before resuspending in Vectashield and mounting onto slides for  
227 imaging.

## 228 **Lethality suppressor screen**

229 Candidate *UAS-RNAi* lines were crossed with the screening stock (*UAS-Pvr; A58-Gal4/TM6B,  
230 tubP-Gal80*) at 22.5°C, at which the best signal to noise ratio of the screen was observed. Flies  
231 were transferred onto fresh vials every two days. *UAS-Luciferase<sup>RNAi</sup>* and *UAS-Pvr<sup>RNAi#2</sup>* were used  
232 as negative and positive controls, respectively. Larvae, pupae, and/or adults emerging from the

233 different crosses were observed six to nine days after egg laying. The *UAS-Luciferase<sup>RNAi</sup>* control  
234 group does not survive to the prepupal and pupal stages, whereas the *UAS-Pvr<sup>RNAi#2</sup>* group survives  
235 until adult stage. Candidate genes were scored as putative suppressors when their corresponding  
236 *UAS-RNAi* transgenes delayed the lethal stage to prepupae or pupae. Median suppression was  
237 defined by the observation of three to five pupae/prepupae in a single vial (annotated in Figure 3C  
238 with “+”). Strong suppression was defined by the observation of six or more pupae/prepupae in a  
239 single vial (annotated in Figure 3C with “++”). No suppression “-“ or variable suppression across  
240 multiple trials “+/-“ were annotated in Figure 3C.

#### 241 **Larval wound closure assay**

242 Pinch wounding of the larvae was carried out according to our detailed protocol (Burra et al. 2013).  
243 In cases where early expression of a UAS transgene was lethal (*UAS-Akt<sup>RNAi</sup>*), larvae bearing *tub-*  
244 *gal80<sup>ts</sup>*, the Gal4 driver and toxic UAS transgene were raised for six days at 18 °C to begin  
245 development, shifted to 32 °C for two days to reach mid-third-instar, and then allowed to recover  
246 at 25 °C following pinch wounding. Pinch wounds were scored as “open” if the initial wound gap  
247 remained after 24 hours, and as “closed” if a continuous epidermal sheet was observed at the  
248 wound site. To calculate the percentage of larvae with open wounds, three sets of  $N \geq 8$  per  
249 genotype were pinched and scored for open wounds under a fluorescent stereo microscope (Leica  
250 MZ16FA with Planapo 1.6x objective and appropriate filters). To further examine wound  
251 morphology, the third instar larval epidermis was dissected and processed as detailed previously  
252 (Burra et al. 2013). To highlight epidermal morphology, a mouse monoclonal antibody against  
253 Fasciclin III was used (1:50; Developmental Studies Hybridoma Bank). An Olympus FV1000  
254 Confocal microscope, Olympus 20x oil lens and Fluoview software were used to obtain images of  
255 the dissected epidermal whole mounts.

## 256 **Statistical analyses**

257 For statistical analysis of the WC phenotype between genotypes, one-way ANOVA (Dunn's  
258 multiple comparisons) were used to test the significance of experiments.

259 For statistical analysis of hemocyte spreading, if the data of all the genotypes passed  
260 D'Agostino and Pearson omnibus normality test, unpaired two-tailed *t*-test (two groups) or one-  
261 way ANOVA (more than two group, Dunn's multiple comparisons) were used to test the  
262 significance of experiments. When data from one or more genotypes did not pass D'Agostino  
263 and Pearson omnibus normality test, Kolmogorov-Smirnov test (two groups) or Kruskal-Wallis  
264 test (more than two groups, Dunn's multiple comparisons) were used to test the significance of  
265 experiments. For all quantitations: ns, not significant; \* $P < 0.05$ ; \*\* $P < 0.01$ ; \*\*\* $P < 0.001$ ;  
266 \*\*\*\* $P < 0.0001$ .

267

268 **Data availability:** Strains and plasmids are available upon request. A supplemental material file  
269 in the online of this article contains Figure S1 and Table S1 (genotypes used in each figure).  
270 Supplemental material available at FigShare.

271

## 272 **Results**

### 273 **Pvr and Pvf1 are required for hemocyte spreading at wound sites**

274 In *Drosophila* larvae, circulating hemocytes adhere to wound sites if they encounter the  
275 wound surface by chance (Babcock et al. 2008). Once there, they assume a spread morphology  
276 and phagocytose wound-associated debris (Babcock et al. 2008). We sought to identify factors  
277 that might be responsible for hemocyte spreading *in vivo*. We began our search with

278 transmembrane proteins known to be expressed on hemocytes and known to affect hemocyte  
279 biology. Pvr (PDGF/VEGF-related receptor) fits these criteria (Bruckner et al. 2004; Cho et al.  
280 2002; Heino et al. 2001). To observe hemocytes at wound sites, we pinch-wounded (Burra et al.  
281 2013) third instar *Drosophila* larvae and used scanning electron microscopy (SEM) to examine  
282 the morphology of wound-adherent hemocytes (see schematic in Fig. 1A). In control larvae (Fig.  
283 1B- see also Table S1 for list of genotypes relevant to each figure panel) large numbers of  
284 hemocytes bound to the wound and assumed a spread morphology. In *Pvr<sup>null/hypo</sup>* (see materials  
285 and methods and Table S1 for allele designations) there were much fewer hemocytes at the  
286 wound site (Fig. 1C). This is to be expected, as Pvr is required for hemocyte survival in embryos  
287 (Bruckner et al. 2004). Further, Pvr activation (Zettervall et al. 2004) or Pvf2 overexpression  
288 (Munier et al. 2002) can drive hemocyte proliferation at the larval stage. We also observed  
289 greatly reduced hemocyte numbers in *Pvf2<sup>hypo</sup>* and in *Pvf3<sup>null</sup>* mutants at the wound sites (Fig.  
290 1D-E), suggesting that these ligands may also be required for hemocyte survival. The third  
291 VEGF-like ligand, Pvf1, showed a different phenotype at wound sites (Fig. 1F) compared to  
292 *Pvf2* and *Pvf3* mutants. While hemocytes were present in substantial numbers at wound sites  
293 within *Pvf1<sup>null</sup>* larvae, closer examination revealed that they possessed a morphology distinct  
294 from controls. Higher magnification views of control larvae (Fig. 1G) show that spread  
295 hemocytes formed a dense and interlinked network of cell processes over the wound site. In  
296 *Pvf1<sup>null</sup>* mutants the hemocytes adhered, but had a distinctly rounded morphology, with few  
297 broad and flattened membrane sheets, even when in close proximity to each other (Fig. 1H).  
298 Quantitation of the spreading index (see materials and methods) between these two genotypes  
299 revealed a significant difference in visible morphology (Fig. 1I). In sum, Pvr and two of its

300 ligands, Pvf2 and Pvf3, are required for normal numbers of wound-adherent hemocytes, while  
301 Pvf1 is required for these cells to assume a spread morphology at the wound site.

302

303 ***In vitro* assays for hemocyte spreading- a flattened lamellar morphology induced by Pvf1**  
304 **application or Pvr activation**

305 *In vivo* loss of function analysis suggested that Pvf1, possibly through the Pvr receptor, is  
306 required for hemocyte spreading. We tested this in another way, by modifying an *in vitro* assay  
307 for hemocyte spreading (Fig. 2A) (D'Ambrosio and Vale 2010; Kiger et al. 2003). Lineage-  
308 labeled plasmatocytes (*hemolectinΔ-Gal4, UAS-GFP*) were collected from third instar larvae,  
309 plated, and exposed to enriched (Fig. S1A) Pvf1 VEGF-like domain (see methods). This  
310 enriched protein was active, as assessed by its ability to cause Pvr phosphorylation in isolated  
311 hemocytes (Fig. S1B-B'). The phosphorylation signal was specific, as it depended upon Pvr  
312 expression in the isolated hemocytes (Fig. S1C-C').

313 Control hemocytes plated *in vitro* assumed a rounded morphology, as assessed by the  
314 cytoplasmic GFP label (Fig. 2B). When stained with phalloidin, which labels filamentous actin,  
315 these cells exhibited a peripheral ring of dense actin filaments (Fig. 2B, top row). Exposure to  
316 enriched and active Pvf1 VEGF-like domain during the period of plating altered the morphology  
317 of these cells- they now exhibited a large lamellipodial-like fan extending outwards from the  
318 peripheral actin ring (Fig. 2B, bottom row). To determine whether this *in vitro* Pvf1-dependent  
319 spreading requires the Pvr receptor, we isolated hemocytes co-expressing a *UAS-Pvr<sup>RNAi</sup>*  
320 transgene whose efficacy has been verified in other assays (Lopez-Bellido et al. 2019; Wu et al.  
321 2009). In the absence of exogenous Pvf1 protein, hemocytes expressing *UAS-Pvr<sup>RNAi#2</sup>* had a

322 morphology and actin distribution similar to controls (Fig. 2C, top row). These same cells, when  
323 plated in the presence of Pvf1 protein, exhibited an apparent increase in cellular actin staining  
324 but did not spread outwards to form a lamellipodial fan (Fig. 2C, bottom row).

325 Finally, we determined whether hyperactivation of Pvr *in vivo* (through expression of the  
326 constitutively active *UAS-Pvr<sup>CA</sup>* transgene (Duchek et al. 2001) could directly lead to spreading  
327 of hemocytes. Hemocytes expressing a *UAS-LifeactGFP* transgene (to label filamentous actin)  
328 and a *UAS-control<sup>RNAi</sup>* transgene (Fig. 2D) possessed a simple rounded morphology *in vitro*. By  
329 contrast, hemocytes co-expressing *UAS-Pvr<sup>CA</sup>* and *UAS-Luciferase<sup>RNAi</sup>* transgene (to equalize the  
330 number of UAS transgenes in the experimental setup) exhibited prominent lamellipodial fans  
331 (Fig. 2E) similar to those observed upon co-culture with the Pvf1 VEGF-like domain (Fig. 2B,  
332 bottom row). The spreading phenotype of different genotypes was measured based on the  
333 average of individual cell diameters measured at the longest axis for each cell. Cell diameters of  
334 hemocytes expressing *UAS-Pvr<sup>CA</sup>* and *UAS-control<sup>RNAi</sup>* were significantly larger than control  
335 (Fig. 2G). The presence of *UAS-Pvr<sup>CA</sup>*-induced lamellipodial fans was dependent upon Pvr, as  
336 co-expression of *UAS-Pvr<sup>CA</sup>* and *UAS-Pvr<sup>RNAi#1</sup>* led to hemocytes with a simple rounded  
337 morphology (Fig. 2F,G). The fan-like morphology of hemocytes expressing activated Pvr was  
338 not simply due to an increase in the original size of the hemocytes. When we measured cell size  
339 before plating (Fig. 2H), there was no difference in the cell diameter of hemocytes expressing  
340 *UAS-Pvr<sup>CA</sup>* versus controls. By contrast, *UAS-Pvr<sup>CA</sup>*-expressing hemocytes were of significantly  
341 greater diameter one hour after plating, an effect that was dependent upon expression of Pvr (Fig.  
342 2G). Together, these data demonstrate that Pvf1 causes hemocyte spreading via Pvr activation.

343

344 **A suppressor screen for genes that act downstream of Pvr signaling**

345 Pvr signaling has a unique place in *Drosophila* tissue damage responses in that it is  
346 required in multiple tissues for diverse cellular responses. In the larval epithelium, Pvr is  
347 required for wound closure (WC) (Wu et al. 2009), in nociceptive sensory neurons for the  
348 perception of noxious mechanical stimuli (Lopez-Bellido et al. 2019), and in hemocytes for  
349 spreading at wound sites (Fig. 1). A challenge in studying this pathway has been that there are no  
350 broadly useful reporters of downstream pathway activity. The anti-phospho-Pvr antibody used in  
351 Fig. S1 is only useful on isolated cells and not for wholemount tissue stains (data not shown).  
352 Given these challenges, we designed a genetic screen to efficiently identify genes that act  
353 downstream of Pvr activation. To do this, we took advantage of the fact that overexpression of  
354 Pvr in the *Drosophila* larval epidermis is lethal (Wu et al. 2009). The screen itself is a lethality  
355 suppressor screen (see conceptual schematic in Fig. 3A). We reasoned that co-expression of  
356 *UAS-RNAi* transgenes targeting potential downstream genes would suppress the lethality induced  
357 by overexpression of Pvr. The screening stock(s) and crossing scheme for the screen is depicted  
358 in Fig. 3B and hinges on the use of the Gal80 system (Vef et al. 2006) to suppress expression of  
359 *UAS-Pvr* and keep the screening stock alive. The candidate set of *UAS-RNAi* lines included  
360 known kinases and adaptors that act downstream of RTKs as well as a broader set of such genes.  
361 The first phenotype screened was the presence of pupae in the vials co-expressing *UAS-Pvr* and  
362 the *UAS-GeneX<sup>RNAi</sup>* transgenes. In total, about 600 genes were screened and 15 lethality  
363 suppressors were obtained (Fig. 3C). Many of the basic components of mitogen-activated protein  
364 kinase (MAPK) and Akt signaling, as well as a subset of common RTK adaptors and other  
365 kinases scored positive as suppressors. Ultimately, all of the lethality suppressors (and further  
366 RNAi or dominant-negative transgenes targeting them) were also screened for phenotypes in

367 larval WC and *in vitro* hemocyte spreading (Fig. 3C, right columns) and a subset of these  
368 phenotypes are shown in the ensuing figures below.

369

### 370 **New wound closure genes- Ras, MKK3, and Mask**

371 In the ideal case, Pvr signaling architecture would be similar between Pvr-induced  
372 lethality and WC and most or all of the lethality suppressors would then score positive as genes  
373 required for larval WC. This was not in fact observed (see discussion section below for possible  
374 explanations). Only a specific subset of the lethality suppressors were also identified as WC  
375 genes. When *UAS-Luciferase<sup>RNAi</sup>* transgenes (negative control) are expressed in the larval  
376 epidermis, pinch wounds close (Fig. 4A). By contrast, when *UAS-Pvr<sup>RNAi</sup>* transgenes are  
377 expressed (Fig. 4B, positive control) pinch wounds remain open at 24 hr post-wounding. The  
378 open-wound phenotypes observed upon expression of *UAS-RNAi* transgenes targeting Ras, a  
379 small GTPase (Fig. 4C), Mask, an adaptor protein (Fig. 4D), and MKK3, a MAP kinase kinase  
380 (Fig. 4E) are shown in Fig. 4, as is quantitation of the prevalence of these phenotypes (Fig. 4F).  
381 The lethality suppressor screen, while not perfect, was nonetheless quite fruitful at expanding our  
382 collection of known WC genes beyond the JNK and actin pathways (Brock et al. 2012; Lesch et  
383 al. 2010). Other genes that scored positive in this screen (*CK1 $\alpha$* ) were also found in an analysis  
384 of adherens junctions at larval wound sites (Tsai and Galko 2019).

385 Which, if any, of the identified WC genes act downstream of Pvr in the context of larval  
386 WC? We designed an experimental strategy (co-expression of *UAS-Pvr<sup>RNAi</sup>* and a *UAS-cDNA*  
387 transgene for candidate genes) that would test this possibility. Certainly, suppression of the full  
388 WC defect caused by *UAS-Pvr<sup>RNAi</sup>* is a high bar, and might only be expected to be observed for



389 those genes at or close to the top of the signaling pathway. Co-expression of an irrelevant gene  
390 (*UAS-LacZ*, negative control) was not capable of suppressing the open-wound phenotype  
391 observed upon expression of *UAS-Pvr<sup>RNAi</sup>* (Fig. 4G) indicating that titrating the Gal4/UAS  
392 system with a additional UAS sequences, by itself, was insufficient to suppress the WC  
393 phenotype. By contrast, co-expression of *UAS-Pvr* (positive control) suppressed the open wound  
394 phenotype of *UAS-Pvr<sup>RNAi</sup>* (Fig. 4H) about half of the time (Fig. 4K). Ras suppressed at a similar  
395 level (Fig. 4I, K) while MKK3 (Fig. 4J, K) was slightly weaker. Ck1 $\alpha$  and Mask could not  
396 suppress (Fig. 4K). Of note, none of the *UAS-cDNA* overexpression transgenes caused an open  
397 wound phenotype on their own (Fig. 4K, right side). In sum, we have identified a number of new  
398 larval WC genes, some of which, by genetic epistasis, can be placed downstream of Pvr in this  
399 particular process.

400

#### 401 **Mask and Akt act downstream of Pvr to mediate hemocyte spreading *in vitro***

402 We devised a parallel strategy to determine which of the Pvr lethality suppressors act  
403 downstream of Pvr in hemocyte spreading. This analysis was somewhat simpler, as we could ask  
404 whether each lethality suppressor could also suppress the hemocyte spreading induced by  
405 hemocyte expression of *UAS-Pvr<sup>CA</sup>* (see Fig. 5A schematic and Fig. 5B control). Co-expression  
406 of *UAS-RNAi* transgenes targeting either Akt (Fig. 5C,E) or Mask (Fig. 5D,F) resulted in a  
407 decrease of the expanded hemocyte cell diameter typically seen upon expression of *UAS-Pvr<sup>CA</sup>*.  
408 By contrast, *UAS-RNAi* and/or *UAS-DN* transgenes targeting MKK3 (Fig. 5G), Ck1 $\alpha$  (Fig. 5H),  
409 or Ras (Fig. 5I) did not block *Pvr<sup>CA</sup>*-induced hemocyte spreading. Importantly, expressions of  
410 either *UAS-Akt<sup>RNAi</sup>* or *UAS-Mask<sup>RNAi</sup>* did not affect basal hemocyte spreading after one hour as

411 measured by cell diameters (Fig. 5J). While some of the genes analyzed (in particular Ras, Ck1a,  
412 and MKK3) caused a general/baseline decrease in basal hemocyte spreading (Fig. 5J), Pvr-  
413 induced spreading was compared to the relevant baseline for each gene (Fig. 5E-I). These results  
414 demonstrate that some Pvr downstream factors (Mask) are shared between larval epidermal WC  
415 and hemocyte spreading while others, (Akt, Ck1a, MKK3, Ras) are specific for a particular  
416 cellular response.

417

### 418 **Mask is also required for hemocyte spreading at wound sites *in vivo***

419 We next analyzed, using the SEM assay introduced in Figure 1, whether genes that have  
420 phenotypes in the *in vitro* hemocyte spreading assay (Mask and Akt) also affected wound-  
421 induced hemocyte spreading *in vivo*. As observed previously control hemocytes typically form a  
422 dense lawn on the wound surface (Fig. 6A) and, when analyzed at higher magnification, exhibit  
423 fan-like lamellipodial extensions either towards each other or towards the cuticle surface (Fig.  
424 6D). In larvae expressing *UAS-Mask<sup>RNAi</sup>* in hemocytes, the wound-adherent cells appeared less  
425 dense (Fig. 6B) and possessed a wrinkled but rounded morphology that did not include  
426 lamellipodia extending either towards each other or the cuticular surface (Fig. 6E). In larvae  
427 expressing *UAS-Akt<sup>RNAi</sup>* in hemocytes (Fig. 6C) there appeared to be a survival defect similar to  
428 that observed for the Pvr, Pvf2 and Pvf3 ligands (Fig. 1C-E), as very few hemocytes were  
429 observed at the wound site. Quantitation of the spreading index in control versus *UAS-Mask<sup>RNAi</sup>*-  
430 expressing hemocytes (Fig. 6F) revealed a significant defect in spreading, indicating that for this  
431 gene, the *in vitro* spreading defect was an accurate predictor of a requirement for spreading *in*  
432 *vivo*.

433

## 434 **Discussion**

435           In this study we establish a new role for Pvf/Pvr signaling in regulating wound-induced  
436 blood cell spreading at the larval stage. Several lines of evidence suggest that the Pvf1 ligand and  
437 its Pvr receptor are required for blood cell spreading. First, blood cells in Pvf1 mutants show a  
438 rounded morphology at wound sites, unlike the typical spread morphology in controls. Second,  
439 Pvf1 can directly induce blood cell spreading *in vitro* in a manner that depends upon function of  
440 Pvr. Finally, Pvr hyperactivation promotes hemocyte spreading in primary cultures of larval  
441 hemocytes. Together these loss- and gain-of-function experiments strongly suggest that Pvf1 and  
442 Pvr are required for blood cell spreading. In this study we also developed a new screening  
443 platform to try to identify genes that might function downstream of Pvr in the various wound  
444 responses for which it is required. This genetic screen for suppression of Pvr-induced lethality  
445 identified a number of genes, some of which have strong phenotypes affecting WC, hemocyte  
446 spreading, or both. Below, we discuss the implications of these findings for wound-induced  
447 hemocyte responses, the diversity of Pvr signaling effects in different cell types, and the  
448 architecture of signaling downstream of Pvr in different wound-responsive cell types.

449           Larvae possess a population of circulating hemocytes that are distributed throughout the  
450 open body cavity and patrol for tissue damage (Brock et al. 2008). Hemocytes that happen to  
451 bump into the wound adhere and spread (Babcock et al. 2008). Our work here suggests that  
452 adhesion and spreading are separable phenomena because in Pvf1 mutants and in larvae  
453 expressing *UAS-Mask<sup>RNAi</sup>* in hemocytes, attachment to wound sites occurs normally though  
454 subsequent spreading at the wound surface does not. In both of these genotypes the circulating  
455 hemocyte populations appear qualitatively normal. In the fly embryo, Pvr and several of its

456 ligands are required for survival (Bruckner et al. 2004) and for developmentally-programmed  
457 hemocyte migrations (Parsons and Foley 2013; Wood et al. 2006) but not for recruitment to  
458 wounds (Wood et al. 2006). Other signaling pathways such as TNF are required for an invasive-  
459 like transmigration near the embryo head (Ratheesh et al. 2018). The differential role of Pvr and  
460 its ligands in embryos and larvae highlight another dimension to the interesting stage-specific  
461 differences in hemocyte recruitment to damaged tissue (Brock et al. 2008; Ratheesh et al. 2015).  
462 There are other contexts besides wound-induced inflammation where hemocytes adhere to both  
463 normal and foreign cellular surfaces in *Drosophila*. These include sessile compartments  
464 (Bretscher et al. 2015), transformed tissue (Pastor-Pareja et al. 2008) and parasitic wasp eggs  
465 (Russo et al. 1996; Williams et al. 2005). It will be interesting to see in future studies if Pvf/Pvr  
466 signaling also plays a role in these events.

467         In addition to its roles in various developmental processes (Garlena et al. 2015; Harris et  
468 al. 2007; Ishimaru et al. 2004; McDonald et al. 2003), Pvf/Pvr signaling is required for a diverse  
469 array of tissue damage responses including epidermal WC (Wu et al. 2009), mechanical  
470 nociception (Lopez-Bellido et al. 2019) and larval hemocyte spreading during inflammation (this  
471 study). Both *in vitro* using S2 cells (Friedman and Perrimon 2006) and *in vivo* using glial cells  
472 (Kim et al. 2014) Pvr signaling screens have been carried out in other contexts. However, it has  
473 been a challenge to identify downstream Pvr signaling components that function in WC due to  
474 the lack of a pathway reporter that functions well *in vivo*. To circumvent this, we designed a  
475 genetic suppressor screen that exploits the fact that overexpression of Pvr in the larval epidermis  
476 is lethal (Wu et al. 2009). The reasons for this lethality are not clear but could potentially be  
477 related to a general hyperactivation of the epidermal WC response. If this hypothesis were  
478 correct, it might be expected that most identified lethality suppressors would also be required for

479 WC. This was not observed. While a substantial set of the lethality suppressors were not found to  
480 affect WC, three factors - Ras, Mask, and MKK3 – did affect WC. This divergence between  
481 suppressors and WC genes could indicate a role for Pvr in maintaining the integrity or survival of  
482 the larval epidermis. Indeed, some of the genes found here overlap with Pvr signaling  
483 components found to be important for hemocyte survival (Sopko et al. 2015).

484         The three suppressors of Pvr-induced lethality that were also found here to be required  
485 for WC include Ras, a small GTPase; MASK, an adaptor protein required for RTK signaling in  
486 other contexts (Smith et al. 2002); and MKK3, a Map kinase kinase (Han et al. 1998). Epistasis  
487 analysis (overexpression of putative downstream Pvr genes in a Pvr-deficient background)  
488 revealed that only those components very close to Pvr in the presumed signaling cascade (Pvr  
489 itself and the Ras GTPase) were capable of partially rescuing the WC defect resulting from loss  
490 of Pvr. This could suggest that the Pvr signaling is performing multiple functions during WC and  
491 there is a split in the cascade downstream of the receptor (between Pvr/Ras and Mask/MKK3).

492         Interestingly, the Pvr suppressors found to be required for hemocyte spreading only  
493 partially overlap with those found required for WC. This is perhaps not too surprising since WC  
494 is a collective cell migration orchestrated by an epithelial tissue whereas hemocyte spreading is  
495 an individual change in morphology occurring in mesodermal cells. In summary, Akt is uniquely  
496 required for spreading *in vitro*; MKK3, Ras and Ck1 $\alpha$  are only required for epidermal WC; and  
497 Mask is required for both *in vitro* and *in vivo* spreading and WC. These results suggest the  
498 signaling cascade downstream of Pvr differs in the two cell types and it will be interesting, now  
499 that genes are identified, to probe how these differences interact with the cytoskeletal  
500 architecture to achieve the observed changes in cell morphology.

501

502 **Acknowledgements:** We thank Drs. Daniel Babcock and Amanda Brock for early work on  
503 wound-induced inflammation in our lab, Dr. Adriana Paulucci-Holthauzen and the MDA  
504 Department of Genetics microscopy facility for light microscopy assistance and Kenneth Dunner  
505 at the UT MD Anderson High Resolution Electron Microscopy Facility for electron microscopy  
506 assistance. Work in the Galko lab is supported through a “people not projects” mechanism-  
507 R35GM126929 of NIGMS. C.-R.T was supported by an American Heart Association predoctoral  
508 fellowship (16PRE30880004). AJ, NS, and JDC were supported by the CPRIT CURE Summer  
509 Undergraduate Research Training Program at MD Anderson Cancer Center (RP170067). Drs.  
510 Swathi Arur, George Eisenhoffer, and Galko laboratory members read and commented on the  
511 manuscript.

512

513 **Competing Interests:** No competing interests declared.

514

515 **Figure Legends:**

516 **Figure 1. Pvr and Pvf1 are required for hemocyte spreading at larval wound sites (A)**

517 Cartoon of third instar *Drosophila* larva (anterior to left, posterior to right) red square  
518 highlighting the region of interest (clear oval, the wound, and black dots, hemocytes) for  
519 scanning electron microscopy (SEM) analysis of pinch wounds. (B-H) Scanning electron  
520 micrographs of wounded and dissected third instar larvae of the indicated genotypes to visualize  
521 wound-adherent blood cells. (B)  $w^{1118}$  control (C)  $Pv^{null/hypol}$  (D)  $Pvf3^{null}$  (E)  $Pvf2^{hypo}$  (F)  $Pvf1^{null}$   
522 Scale bar in (B) = 50  $\mu\text{m}$  and applies to (B-F) (G) Close-up of spread hemocytes,  $w^{1118}$ . (H)  
523 Close-up of unspread hemocytes indicated by arrows,  $Pvf1^{null}$ . Scale bar in (G) = 10  $\mu\text{m}$  and

524 applies to (G-H). (I) Quantitation of blood cell spreading in control larvae versus *Pvf1<sup>null</sup>* mutant  
525 larvae. n = 12. Data are mean with 95% CI. \*\* $P < 0.01$  (unpaired two-tailed *t*-test).

526

527 **Figure 2. Testing the role of Pvr/Pvf1 in hemocyte spreading with *in vitro* assays.** (A)

528 Schematic of hemocyte spreading assay for treatment with Pvf1. (B) Untreated control

529 hemocytes (*w<sup>1118</sup>*; *hemolectinΔ-Gal4*, *UAS-GFP*) and treated (+ enriched Pvf1 protein)

530 hemocytes are shown. Blood cells were harvested from larvae, plated *in vitro*, fixed, and

531 visualized with the GFP lineage label (green, left column), phalloidin to label filamentous actin

532 (red, middle column), or both (merge, right column) in the absence (top row) or presence

533 (bottom row) of enriched Pvf1 protein. Scale bar in (B) = 10 μm and applies to (B-C). (C) Same

534 experiment as in (B) but now the hemocytes are also expressing a *UAS-Pvr<sup>RNAi</sup>* transgene

535 (bottom row) or not (top row) to test whether the spreading response observed upon addition of

536 Pvf1 protein depends on functional Pvr expression. (D-F) Morphology of plated hemocytes

537 (*w<sup>1118</sup>*; *hemolectinΔGal4*, *UAS-LifeActGFP*, green) with the indicated transgenes. Scale bar in

538 (D) = 10 μm and applies (D-F). Double-headed Arrow in (D-F) are examples of cell longest

539 diameters. (D) *UAS-Control<sup>RNAi</sup>*. (E) *UAS-Pvr<sup>CA</sup>* + *UAS-Control<sup>RNAi</sup>*. (F) *UAS-Pvr<sup>CA</sup>* + *UAS-*

540 *Pvr<sup>RNAi#1</sup>*. (G-H) Quantitation of hemocyte cell diameters (μm) of the indicated genotypes after 1

541 hour of plating (G) or before plating (H) to test whether expression of *UAS-Pvr<sup>CA</sup>* affects

542 hemocyte size in any way. (G,H) Each dot represents the diameter of a single cell. Error bars:

543 mean with 95% CI. (G) n = 30, (Kruskal-Wallis multiple comparisons test). (H) n = 25; ns, not

544 significant (Kolmogorov-Smirnov test).

545

546 **Figure 3. Targeted genetic screen for suppressors of Pvr-induced lethality** (A) Conceptual  
547 schematic of genetic screen. Pvr overexpression in the larval epidermis is lethal. We screened for  
548 RNAi lines (targeting possible/probable downstream components of RTK signaling) that, when  
549 co-expressed with Pvr, could suppress this lethality (B) Genetic scheme of the screen, illustrating  
550 the genotypes, crosses, and scoring involved. (C) Lethality suppressors from the screen,  
551 organized by gene class. Also shown are whether the suppressors affected epidermal wound  
552 closure (WC) at the larval stage and/or hemocyte spreading in the *in vitro* assay (see Fig. 2). For  
553 the strength of lethality suppressions: ++, strong suppression. +, median suppression. -, no  
554 suppression. +/-, variable suppression effects. N.D., not determined.

555

556 **Figure 4. Epidermal wound closure phenotypes of select suppressors of Pvr-induced**  
557 **lethality and genetic interactions with Pvr**

558 (A-E) Dissected epidermal whole mounts of wounded third instar larval epidermis, expressing  
559 *UAS-dsRed2Nuc* (Nuclei, magenta) and *UAS-src-GFP* (GFP, not shown) and expressing the  
560 indicated transgenes via *e22c-Gal4* driver, immunostained with anti-Fasciclin III (green). Open  
561 wounds appear as dark holes in the center. (A) *UAS-Control<sup>RNAi</sup>* (B) *UAS-Pvr<sup>RNAi#1</sup>* (C) *UAS-*  
562 *Ras<sup>RNAi#1</sup>* (D) *UAS-Mask<sup>RNAi#1</sup>* (E) *UAS-MKK3<sup>RNAi#2</sup>*. Scale bar, 50  $\mu$ m in (A) is for (A-E). (F)

563 Quantitation of larval WC phenotypes (% Open wounds) versus genotype. Each dot represents  
564 one set of  $n \geq 8$ . Total three or more sets for each genotype. Error bar, mean  $\pm$  S.E.M. One-way  
565 ANOVA with Dunn's multiple comparisons. \*\*\*\* $P < 0.0001$ , \*\*\* $P < 0.001$ , \*\* $P < 0.01$ , \* $P < 0.05$ .

566 (G-J) Epistasis. Ability of overexpression of select WC genes to rescue the WC phenotype of  
567 *UAS-Pvr<sup>RNAi#2</sup>*. Genotype of all panels: *w<sup>1118</sup>*; *UAS-Pvr<sup>RNAi#2</sup>/+*; *A58-Gal4*, *UAS-dsRed2Nuc*,  
568 *UAS-src-GFP* (not shown) plus the indicated overexpression transgene. (G) *UAS-Pvr<sup>RNAi#2</sup> +*



569 *UAS-lacZ*. (H) *UAS-Pvr<sup>RNAi#2</sup>* + *UAS-Pvr*. (I) *UAS-Pvr<sup>RNAi#2</sup>* + *UAS-Ras*. (J) *UAS-Pvr<sup>RNAi#2</sup>* +  
570 *UAS-MKK3*. Scale bar, 50  $\mu$ m in (G) is for (G-J). (K) Quantitation of epistasis experiments- %  
571 Open wounds versus the indicated genotypes. Each dot represents one set of  $n \geq 8$ . Total three or  
572 more sets for each genotype. Error bar, mean  $\pm$  S.E.M. One-way ANOVA multiple comparisons.  
573 \*\*\*\* $P < 0.0001$ , \*\*\* $P < 0.001$ , \*\* $P < 0.01$ , ns, not significant.

574

575 **Figure 5. Hemocyte spreading phenotypes of select suppressors of Pvr-induced lethality (A)**

576 Conceptual schematic of hemocyte spreading assay. Overexpression of a constitutive active form  
577 of Pvr ( $Pvr^{CA}$ ) in the larval hemocytes promote cell spreading. We screened for lethality  
578 suppressor RNAi lines that, when co-expressed with  $Pvr^{CA}$ , could suppress the spreading  
579 phenotype. (B-D) Hemocyte morphology of hemocytes harvested from larvae of the genotype  
580 (*UAS-Pvr<sup>CA</sup>*, *hml  $\Delta$ -Gal4*, *UAS-LifeactGFP*) plus the indicated transgenes, plated one hour *in*  
581 *vitro*, and visualized by the actin/lineage label (green). (B) *UAS-Pvr<sup>CA</sup>* + *control<sup>RNAi</sup>*. (C) *UAS-*  
582 *Pvr<sup>CA</sup>* + *UAS-Akt<sup>RNAi</sup>*. (D) *UAS-Pvr<sup>CA</sup>* + *UAS-Mask<sup>RNAi#1</sup>*. (E-J) Quantitation of hemocytes  
583 diameter (spreading) versus the indicated genotypes targeting particular genes. Each dot  
584 represents a single cell.  $n = 30$ . Error bars: mean with 95% CI. \*\*\*\* $P < 0.0001$ . \*\*\* $P < 0.001$ .  
585 \*\* $P < 0.01$ . ns, not significant. (E) Akt. Unpaired *t*-test. (F) Mask. Kruskal-Wallis multiple  
586 comparisons test. (G) MKK3. Kruskal-Wallis multiple comparisons test (H) Ck1 $\alpha$ . Kruskal-  
587 Wallis multiple comparisons test (I) Ras. One-way ANOVA multiple comparison. (J)  
588 Expressions of *UAS-Akt<sup>RNAi</sup>* and *UAS-Mask<sup>RNAi</sup>* in hemocytes did not affect basal spreading,  
589 while *UAS-Ras<sup>RNAi</sup>*, *UAS-Ck1 $\alpha$ <sup>RNAi</sup>* and *MKK3<sup>RNAi</sup>* reduced basal spreading. Kruskal-Wallis  
590 multiple comparisons test.

591

592 **Figure 6. Mask is required for hemocyte spreading at wound sites.** (A-E) Scanning electron  
593 micrographs of wounded and dissected third instar larvae of the indicated genotypes to visualize  
594 wound-adherent blood cells. (A) Control. (B) *UAS-Mask<sup>RNAi</sup>*. (C) *UAS-Akt<sup>RNAi</sup>*. (D) Control-  
595 closeup image of white box in (A). Arrowheads indicate hemocyte lamellae. (E) *UAS-Mask<sup>RNAi</sup>*-  
596 closeup image of white box in (B). In all panels (A-E) the bare larval cuticle and cell debris is  
597 underneath the attached hemocytes (see outlined region in (C) which lacks attached hemocytes).  
598 (F) Quantitation of hemocyte spreading index at wound sites in control and *UAS-Mask<sup>RNAi</sup>*-  
599 expressing larvae. Unpaired *t*-test.

600

601 **References:**

- 602 Adachi-Yamada T, Nakamura M, Irie K, Tomoyasu Y, Sano Y, Mori E, Goto S, Ueno N,  
603 Nishida Y, Matsumoto K. 1999. P38 mitogen-activated protein kinase can be involved in  
604 transforming growth factor beta superfamily signal transduction in drosophila wing  
605 morphogenesis. *Mol Cell Biol.* 19(3):2322-2329.
- 606 Babcock DT, Brock AR, Fish GS, Wang Y, Perrin L, Krasnow MA, Galko MJ. 2008.  
607 Circulating blood cells function as a surveillance system for damaged tissue in drosophila  
608 larvae. *Proc Natl Acad Sci U S A.* 105(29):10017-10022.
- 609 Baek SH, Kwon YC, Lee H, Choe KM. 2010. Rho-family small gtpases are required for cell  
610 polarization and directional sensing in drosophila wound healing. *Biochem Biophys Res*  
611 *Commun.* 394(3):488-492.
- 612 Beinert N, Werner M, Dowe G, Chung HR, Jäckle H, Schäfer U. 2004. Systematic gene  
613 targeting on the x chromosome of drosophila melanogaster. *Chromosoma.* 113(6):271-  
614 275.
- 615 Brand AH, Perrimon N. 1993. Targeted gene expression as a means of altering cell fates and  
616 generating dominant phenotypes. *Development.* 118(2):401-415.
- 617 Bretscher AJ, Honti V, Binggeli O, Burri O, Poidevin M, Kurucz É, Zsámboki J, Andó I,  
618 Lemaitre B. 2015. The nimrod transmembrane receptor eater is required for hemocyte  
619 attachment to the sessile compartment in drosophila melanogaster. *Biology open.*  
620 4(3):355-363.
- 621 Brock AR, Babcock DT, Galko MJ. 2008. Active cop, passive cop: Developmental stage-  
622 specific modes of wound-induced blood cell recruitment in drosophila. *Fly.* 2(6):303-305.
- 623 Brock AR, Wang Y, Berger S, Renkawitz-Pohl R, Han VC, Wu Y, Galko MJ. 2012.  
624 Transcriptional regulation of profilin during wound closure in drosophila larvae. *J Cell*  
625 *Sci.* 125(Pt 23):5667-5676.
- 626 Bruckner K, Kockel L, Duchek P, Luque CM, Rorth P, Perrimon N. 2004. The pdgf/vegf  
627 receptor controls blood cell survival in drosophila. *Dev Cell.* 7(1):73-84.
- 628 Burra S, Wang Y, Brock AR, Galko MJ. 2013. Using drosophila larvae to study epidermal  
629 wound closure and inflammation. *Methods Mol Biol.* 1037:449-461.
- 630 Cho NK, Keyes L, Johnson E, Heller J, Ryner L, Karim F, Krasnow MA. 2002. Developmental  
631 control of blood cell migration by the drosophila vegf pathway. *Cell.* 108(6):865-876.
- 632 D'Ambrosio MV, Vale RD. 2010. A whole genome rnai screen of drosophila s2 cell spreading  
633 performed using automated computational image analysis. *J Cell Biol.* 191(3):471-478.
- 634 Dietzl G, Chen D, Schnorrrer F, Su KC, Barinova Y, Fellner M, Gasser B, Kinsey K, Oettel S,  
635 Scheiblauer S et al. 2007. A genome-wide transgenic rnai library for conditional gene  
636 inactivation in drosophila. *Nature.* 448(7150):151-156.
- 637 Duchek P, Somogyi K, Jekely G, Beccari S, Rorth P. 2001. Guidance of cell migration by the  
638 drosophila pdgf/vegf receptor. *Cell.* 107(1):17-26.
- 639 Eming SA, Krieg T, Davidson JM. 2007. Inflammation in wound repair: Molecular and cellular  
640 mechanisms. *J Invest Dermatol.* 127(3):514-525.
- 641 Fernández-Espartero CH, Ramel D, Farago M, Malartre M, Luque CM, Limanovich S, Katzav S,  
642 Emery G, Martín-Bermudo MD. 2013. Gtp exchange factor vav regulates guided cell  
643 migration by coupling guidance receptor signalling to local rac activation. *J Cell Sci.*  
644 126(Pt 10):2285-2293.

- 645 Friedman A, Perrimon N. 2006. A functional rna screen for regulators of receptor tyrosine  
646 kinase and erk signalling. *Nature*. 444(7116):230-234.
- 647 Galko MJ, Krasnow MA. 2004. Cellular and genetic analysis of wound healing in drosophila  
648 larvae. *PLoS Biol*. 2(8):E239.
- 649 Garlena RA, Lennox AL, Baker LR, Parsons TE, Weinberg SM, Stronach BE. 2015. The  
650 receptor tyrosine kinase pvr promotes tissue closure by coordinating corpse removal and  
651 epidermal zippering. *Development*. 142(19):3403-3415.
- 652 Han ZS, Enslin H, Hu X, Meng X, Wu IH, Barrett T, Davis RJ, Ip YT. 1998. A conserved p38  
653 mitogen-activated protein kinase pathway regulates drosophila immunity gene  
654 expression. *Mol Cell Biol*. 18(6):3527-3539.
- 655 Harris KE, Schnittke N, Beckendorf SK. 2007. Two ligands signal through the drosophila  
656 pdgf/vegf receptor to ensure proper salivary gland positioning. *Mech Dev*. 124(6):441-  
657 448.
- 658 Hatan M, Shinder V, Israeli D, Schnorrer F, Volk T. 2011. The drosophila blood brain barrier is  
659 maintained by gpcr-dependent dynamic actin structures. *J Cell Biol*. 192(2):307-319.
- 660 Heino TI, Karpanen T, Wahlstrom G, Pulkkinen M, Eriksson U, Alitalo K, Roos C. 2001. The  
661 drosophila vegf receptor homolog is expressed in hemocytes. *Mech Dev*. 109(1):69-77.
- 662 Ishimaru S, Ueda R, Hinohara Y, Ohtani M, Hanafusa H. 2004. Pvr plays a critical role via jnk  
663 activation in thorax closure during drosophila metamorphosis. *EMBO J*. 23(20):3984-  
664 3994.
- 665 Janssens K, Sung HH, Rorth P. 2010. Direct detection of guidance receptor activity during  
666 border cell migration. *Proc Natl Acad Sci U S A*. 107(16):7323-7328.
- 667 Jékely G, Sung HH, Luque CM, Røth P. 2005. Regulators of endocytosis maintain localized  
668 receptor tyrosine kinase signaling in guided migration. *Dev Cell*. 9(2):197-207.
- 669 Kadandale P, Stender JD, Glass CK, Kiger AA. 2010. Conserved role for autophagy in rho1-  
670 mediated cortical remodeling and blood cell recruitment. *Proc Natl Acad Sci U S A*.  
671 107(23):10502-10507.
- 672 Kakanj P, Moussian B, Gronke S, Bustos V, Eming SA, Partridge L, Leptin M. 2016. Insulin and  
673 tor signal in parallel through foxo and s6k to promote epithelial wound healing. *Nature*  
674 *communications*. 7:12972.
- 675 Karim FD, Rubin GM. 1998. Ectopic expression of activated ras1 induces hyperplastic growth  
676 and increased cell death in drosophila imaginal tissues. *Development*. 125(1):1-9.
- 677 Kiger AA, Baum B, Jones S, Jones MR, Coulson A, Echeverri C, Perrimon N. 2003. A  
678 functional genomic analysis of cell morphology using rna interference. *Journal of*  
679 *biology*. 2(4):27.
- 680 Kim SN, Jeibmann A, Halama K, Witte HT, Wälte M, Matzat T, Schillers H, Faber C, Senner V,  
681 Paulus W et al. 2014. Ecm stiffness regulates glial migration in drosophila and  
682 mammalian glioma models. *Development*. 141(16):3233-3242.
- 683 Lawrence PA, Bodmer R, Vincent JP. 1995. Segmental patterning of heart precursors in  
684 drosophila. *Development*. 121(12):4303-4308.
- 685 Lee CW, Kwon YC, Lee Y, Park MY, Choe KM. 2019. Cdc37 is essential for jnk pathway  
686 activation and wound closure in drosophila. *Mol Biol Cell*. 30(21):2651-2658.
- 687 Lee JH, Lee CW, Park SH, Choe KM. 2017. Spatiotemporal regulation of cell fusion by jnk and  
688 jak/stat signaling during drosophila wound healing. *J Cell Sci*. 130(11):1917-1928.
- 689 Lee T, Feig L, Montell DJ. 1996. Two distinct roles for ras in a developmentally regulated cell  
690 migration. *Development*. 122(2):409-418.

- 691 Lesch C, Jo J, Wu Y, Fish GS, Galko MJ. 2010. A targeted uas-rnai screen in drosophila larvae  
692 identifies wound closure genes regulating distinct cellular processes. *Genetics*.  
693 186(3):943-957.
- 694 Levin DM, Breuer LN, Zhuang S, Anderson SA, Nardi JB, Kanost MR. 2005. A hemocyte-  
695 specific integrin required for hemocytic encapsulation in the tobacco hornworm,  
696 *manduca sexta*. *Insect Biochem Mol Biol*. 35(5):369-380.
- 697 Lopez-Bellido R, Puig S, Huang PJ, Tsai CR, Turner HN, Galko MJ, Gutstein HB. 2019. Growth  
698 factor signaling regulates mechanical nociception in flies and vertebrates. *J Neurosci*.
- 699 McDonald JA, Pinheiro EM, Montell DJ. 2003. Pvf1, a pdgf/vegf homolog, is sufficient to guide  
700 border cells and interacts genetically with taiman. *Development*. 130(15):3469-3478.
- 701 McGuire SE, Mao Z, Davis RL. 2004. Spatiotemporal gene expression targeting with the target  
702 and gene-switch systems in drosophila. *Sci STKE*. 2004(220):pl6.
- 703 Mondal BC, Shim J, Evans CJ, Banerjee U. 2014. Pvr expression regulators in equilibrium signal  
704 control and maintenance of drosophila blood progenitors. *Elife*. 3:e03626.
- 705 Moreira CG, Regan JC, Zaidman-Rémy A, Jacinto A, Prag S. 2011. Drosophila hemocyte  
706 migration: An in vivo assay for directional cell migration. *Methods Mol Biol*. 769:249-  
707 260.
- 708 Moreira S, Stramer B, Evans I, Wood W, Martin P. 2010. Prioritization of competing damage  
709 and developmental signals by migrating macrophages in the drosophila embryo. *Current*  
710 *biology : CB*. 20(5):464-470.
- 711 Munier AI, Doucet D, Perrodou E, Zachary D, Meister M, Hoffmann JA, Janeway CA, Jr.,  
712 Lagueux M. 2002. Pvf2, a pdgf/vegf-like growth factor, induces hemocyte proliferation  
713 in drosophila larvae. *EMBO Rep*. 3(12):1195-1200.
- 714 Nardi JB, Pilas B, Bee CM, Zhuang S, Garsha K, Kanost MR. 2006. Neuroglial-positive  
715 plasmatocytes of *manduca sexta* and the initiation of hemocyte attachment to foreign  
716 surfaces. *Dev Comp Immunol*. 30(5):447-462.
- 717 Ni JQ, Zhou R, Czech B, Liu LP, Holderbaum L, Yang-Zhou D, Shim HS, Tao R, Handler D,  
718 Karpowicz P et al. 2011. A genome-scale shRNA resource for transgenic RNAi in drosophila.  
719 *Nat Methods*. 8(5):405-407.
- 720 Parsons B, Foley E. 2013. The drosophila platelet-derived growth factor and vascular endothelial  
721 growth factor-receptor related (pvr) protein ligands pvf2 and pvf3 control hemocyte  
722 viability and invasive migration. *J Biol Chem*. 288(28):20173-20183.
- 723 Pastor-Pareja JC, Wu M, Xu T. 2008. An innate immune response of blood cells to tumors and  
724 tissue damage in drosophila. *Dis Model Mech*. 1(2-3):144-154; discussion 153.
- 725 Ramos-Lewis W, LaFever KS, Page-McCaw A. 2018. A scar-like lesion is apparent in basement  
726 membrane after wound repair in vivo. *Matrix Biol*. 74:101-120.
- 727 Ratheesh A, Belyaeva V, Siekhaus DE. 2015. Drosophila immune cell migration and adhesion  
728 during embryonic development and larval immune responses. *Curr Opin Cell Biol*.  
729 36:71-79.
- 730 Ratheesh A, Biebl J, Vesela J, Smutny M, Papusheva E, Krens SFG, Kaufmann W, Gyoergy A,  
731 Casano AM, Siekhaus DE. 2018. Drosophila *tnf* modulates tissue tension in the embryo  
732 to facilitate macrophage invasive migration. *Dev Cell*. 45(3):331-346.e337.
- 733 Russo J, Dupas S, Frey F, Carton Y, Brehelin M. 1996. Insect immunity: Early events in the  
734 encapsulation process of parasitoid (*leptopilina boulardi*) eggs in resistant and susceptible  
735 strains of drosophila. *Parasitology*. 112 ( Pt 1):135-142.

- 736 Sinenko SA, Mathey-Prevot B. 2004. Increased expression of drosophila tetraspanin, *tsp68c*,  
737 suppresses the abnormal proliferation of *ytr*-deficient and *ras/raf*-activated hemocytes.  
738 *Oncogene*. 23(56):9120-9128.
- 739 Smith RK, Carroll PM, Allard JD, Simon MA. 2002. Mask, a large ankyrin repeat and kh  
740 domain-containing protein involved in drosophila receptor tyrosine kinase signaling.  
741 *Development*. 129(1):71-82.
- 742 Sopko R, Lin YB, Makhijani K, Alexander B, Perrimon N, Brückner K. 2015. A systems-level  
743 interrogation identifies regulators of drosophila blood cell number and survival. *PLoS*  
744 *Genet*. 11(3):e1005056.
- 745 Stramer B, Wood W, Galko MJ, Redd MJ, Jacinto A, Parkhurst SM, Martin P. 2005. Live  
746 imaging of wound inflammation in drosophila embryos reveals key roles for small  
747 gtpases during in vivo cell migration. *J Cell Biol*. 168(4):567-573.
- 748 Stramer BM, Dionne MS. 2014. Unraveling tissue repair immune responses in flies. *Semin*  
749 *Immunol*. 26(4):310-314.
- 750 Sullivan KM, Rubin GM. 2002. The  $ca(2+)$ -calmodulin-activated protein phosphatase  
751 calcineurin negatively regulates *egf* receptor signaling in drosophila development.  
752 *Genetics*. 161(1):183-193.
- 753 Tsai CR, Galko MJ. 2019. Casein kinase 1alpha decreases beta-catenin levels at adherens  
754 junctions to facilitate wound closure in drosophila larvae. *Development*. 146(20).
- 755 Tsai CR, Wang Y, Galko MJ. 2018. Crawling wounded: Molecular genetic insights into wound  
756 healing from drosophila larvae. *Int J Dev Biol*. 62(6-7-8):479-489.
- 757 Vef O, Cleppien D, Löffler T, Altenhein B, Technau GM. 2006. A new strategy for efficient in  
758 vivo screening of mutagenized drosophila embryos. *Dev Genes Evol*. 216(2):105-108.
- 759 Venken KJ, Schulze KL, Haelterman NA, Pan H, He Y, Evans-Holm M, Carlson JW, Levis RW,  
760 Spradling AC, Hoskins RA et al. 2011. Mimic: A highly versatile transposon insertion  
761 resource for engineering drosophila melanogaster genes. *Nat Methods*. 8(9):737-743.
- 762 Wang Y, Antunes M, Anderson AE, Kadrmas JL, Jacinto A, Galko MJ. 2015. Integrin adhesions  
763 suppress syncytium formation in the drosophila larval epidermis. *Curr Biol*. 25(17):2215-  
764 2227.
- 765 reveals spatio-temporal properties of the wound attractant gradient. *Curr Biol*. TBD(TBD):TBD.
- 766 Weavers H, Liepe J, Sim A, Wood W, Martin P, Stumpf MPH. 2016. Systems analysis of the  
767 dynamic inflammatory response to tissue damage reveals spatiotemporal properties of the  
768 wound attractant gradient. *Curr Biol*. 26(15):1975-1989.
- 769 Williams MJ, Ando I, Hultmark D. 2005. *Drosophila melanogaster rac2* is necessary for a proper  
770 cellular immune response. *Genes Cells*. 10(8):813-823.
- 771 Wood W, Faria C, Jacinto A. 2006. Distinct mechanisms regulate hemocyte chemotaxis during  
772 development and wound healing in drosophila melanogaster. *J Cell Biol*. 173(3):405-416.
- 773 Wu Y, Brock AR, Wang Y, Fujitani K, Ueda R, Galko MJ. 2009. A blood-borne pdgf/vegf-like  
774 ligand initiates wound-induced epidermal cell migration in drosophila larvae. *Curr Biol*.  
775 19(17):1473-1477.
- 776 Zettervall CJ, Anderl I, Williams MJ, Palmer R, Kurucz E, Ando I, Hultmark D. 2004. A  
777 directed screen for genes involved in drosophila blood cell activation. *Proc Natl Acad Sci*  
778 *U S A*. 101(39):14192-14197.

779



Fig.1

# Hemocytes at the wound (Scanning Electron Microscopy)

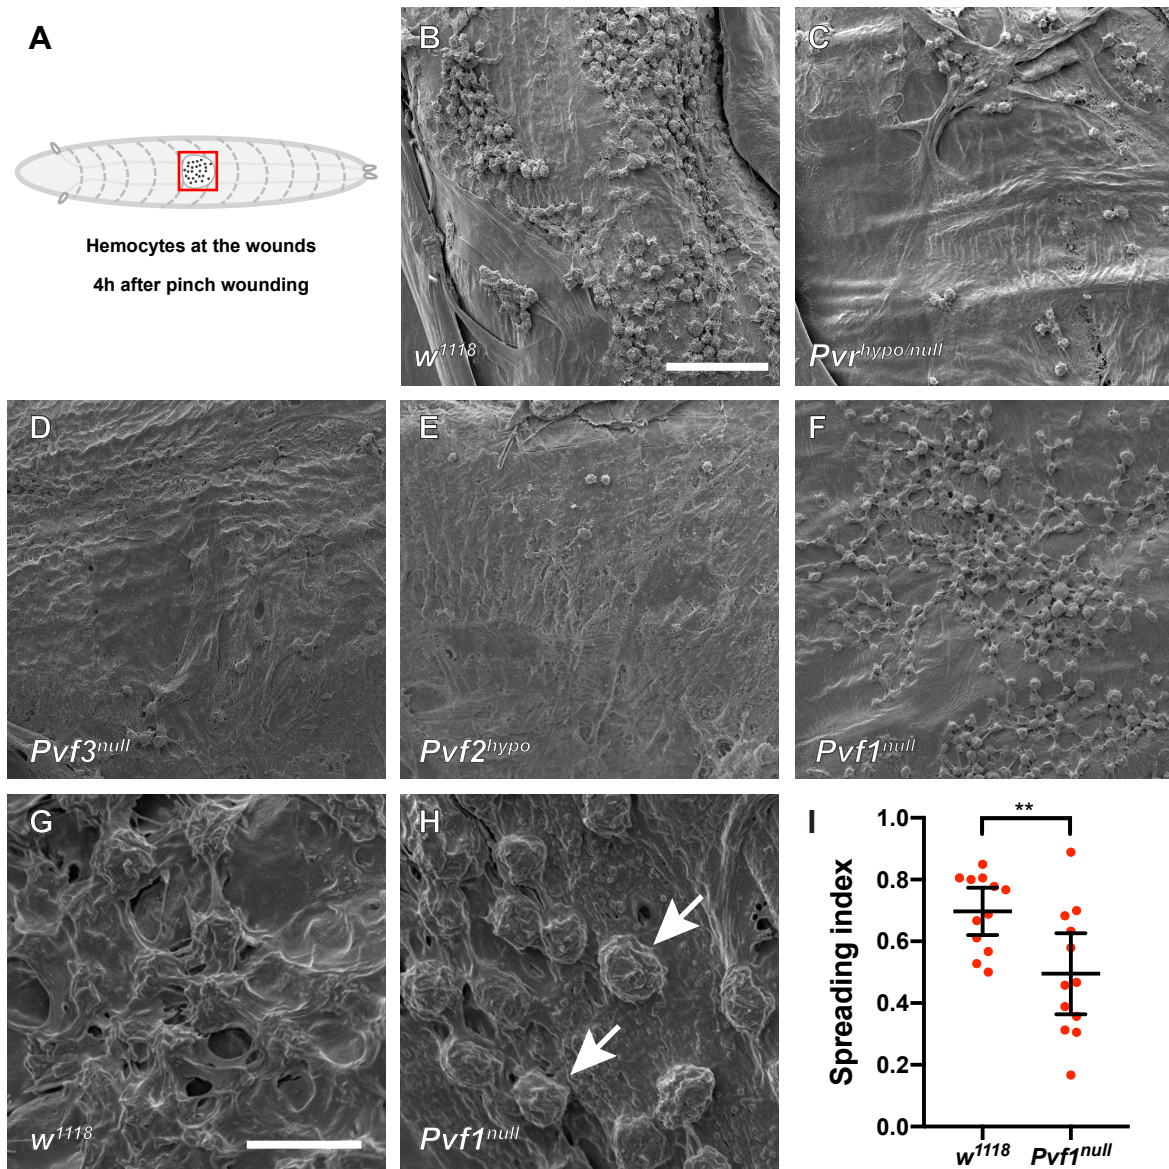

**Fig.2**

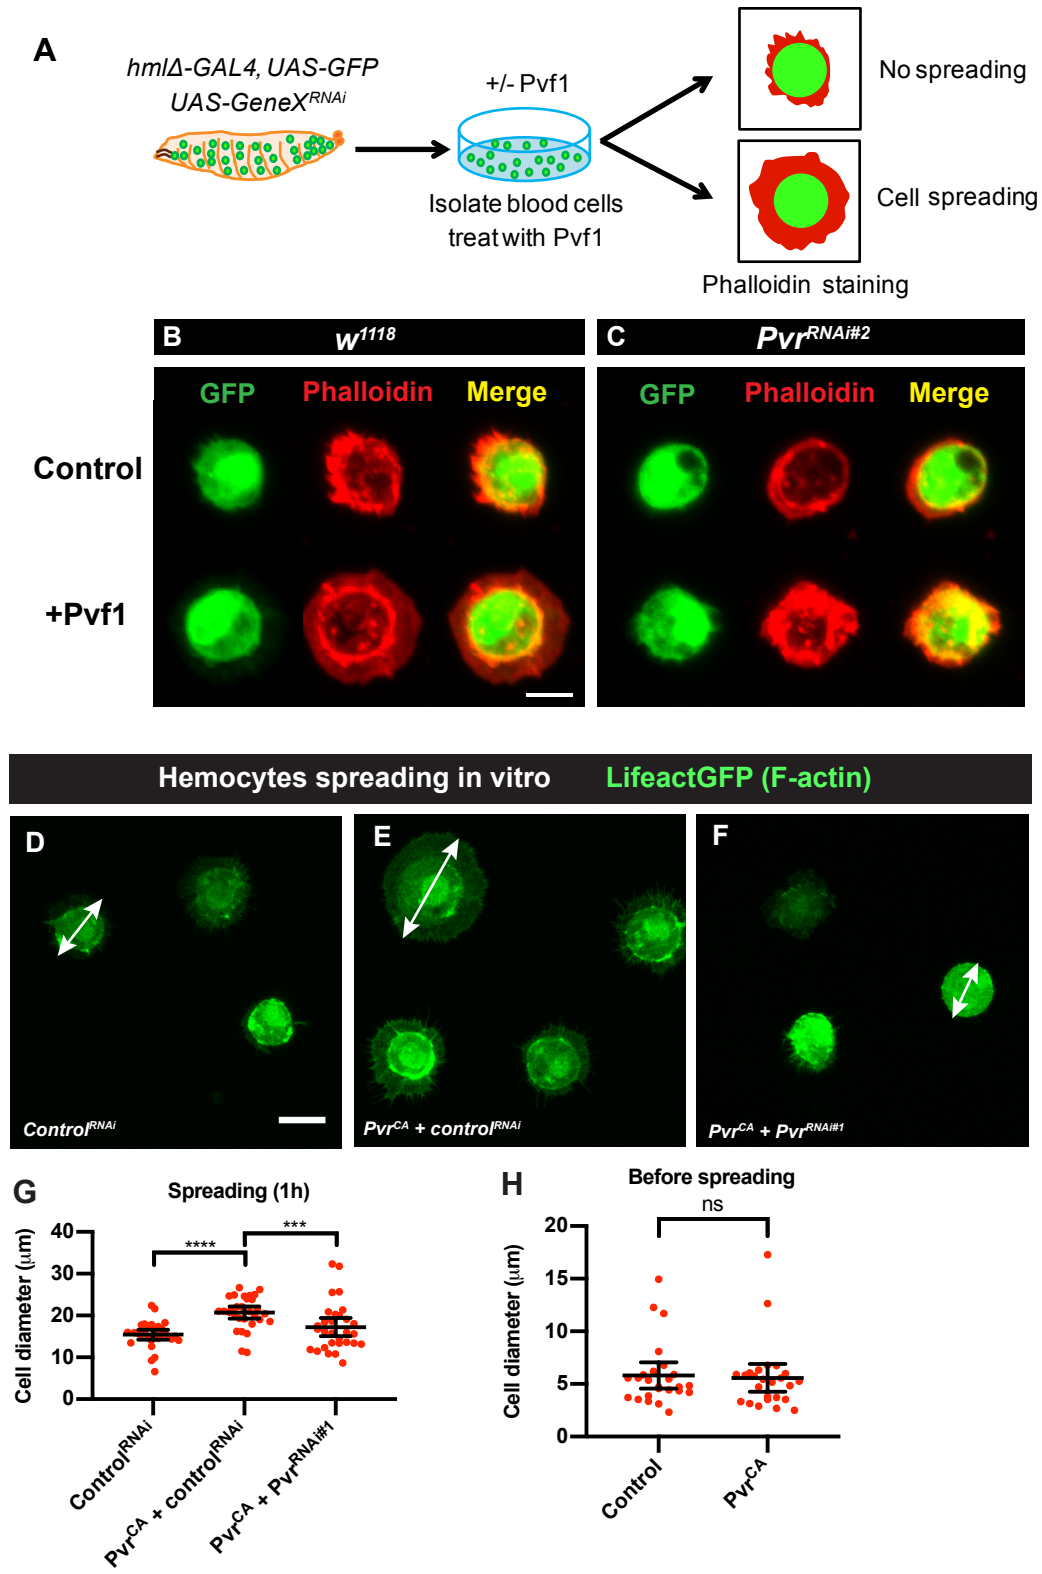



**Fig.3**

**A**

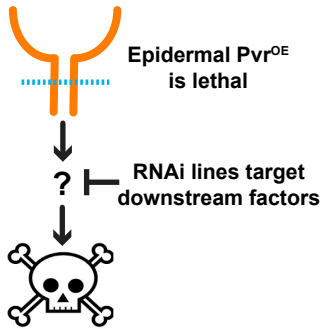

**B**

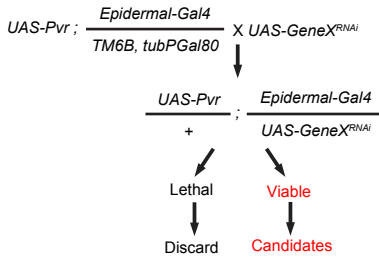

**C**

| Gene class     | Gene name     | RNAi or dominant negative (DN) transgenes | Lethality suppression | Wound closure defect | Hemocyte spreading (Pvr <sup>CA</sup> ) |
|----------------|---------------|-------------------------------------------|-----------------------|----------------------|-----------------------------------------|
| MAPK signaling | <i>Ras</i>    | BL4845 ( <i>Ras</i> <sup>DN</sup> )       | N.D.                  | No                   | No                                      |
|                | <i>Ras</i>    | 9375R-1 (RNAi#1)                          | ++                    | Yes                  | No                                      |
|                | <i>Ras</i>    | BL29319 (RNAi#2)                          | +                     | No                   | No                                      |
|                | <i>Ras</i>    | BL34619 (RNAi#3)                          | +                     | No                   | No                                      |
|                | <i>Erk</i>    | BL34855                                   | +                     | No                   | No                                      |
|                | <i>Vav</i>    | BL39059                                   | +                     | No                   | No                                      |
|                | <i>MEKK1</i>  | 7717R-1                                   | +                     | No                   | No                                      |
|                | <i>MKK3</i>   | V106822 (RNAi#1)                          | +                     | Yes                  | No                                      |
|                | <i>MKK3</i>   | V20166 (RNAi#2)                           | -                     | Yes                  | No                                      |
|                | <i>MKK3</i>   | BL60010 (RNAi#3)                          | N.D.                  | N.D.                 | No                                      |
|                | <i>p38b</i>   | BL59005                                   | +                     | No                   | No                                      |
| Akt signaling  | <i>PI3K</i>   | BL27690                                   | +                     | No                   | No                                      |
|                | <i>TOR</i>    | BL35578 (RNAi#1)                          | ++                    | No                   | No                                      |
|                | <i>TOR</i>    | BL33951 (RNAi#2)                          | ++                    | No                   | No                                      |
|                | <i>Akt</i>    | BL33615                                   | +                     | No                   | Yes                                     |
| Adaptors       | <i>drk</i>    | BL27563                                   | +                     | No                   | No                                      |
|                | <i>Crk</i>    | 1587R-1                                   | ++                    | No                   | No                                      |
|                | <i>Mask</i>   | BL34571 (RNAi#1)                          | +                     | Yes                  | Yes                                     |
|                | <i>Mask</i>   | 6313R-2 (RNAi#2)                          | +                     | Yes                  | Yes                                     |
| Others         | <i>CG1227</i> | V105610                                   | +                     | No                   | No                                      |
|                | <i>Ck1α</i>   | BL25786 (RNAi#1)                          | +/-                   | Yes                  | No                                      |
|                | <i>Ck1α</i>   | BL35153 (RNAi#2)                          | +/-                   | Yes                  | No                                      |
|                | <i>GckIII</i> | BL35339                                   | ++                    | No                   | No                                      |

Fig. 4

Wound closure phenotype (e22c-Gal4 driver)

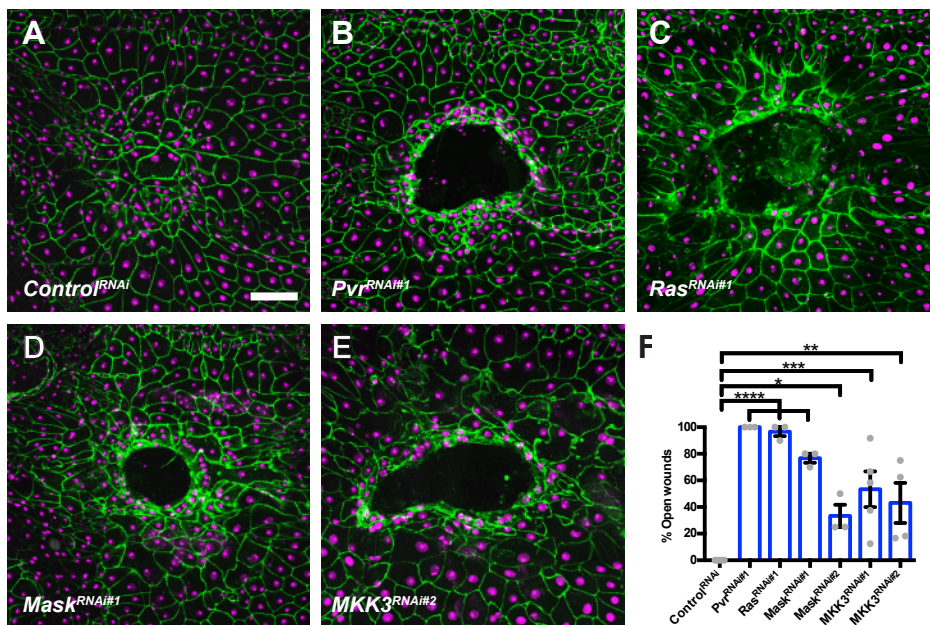

Genetic interaction with *Pvr* (A58-Gal4 driver)

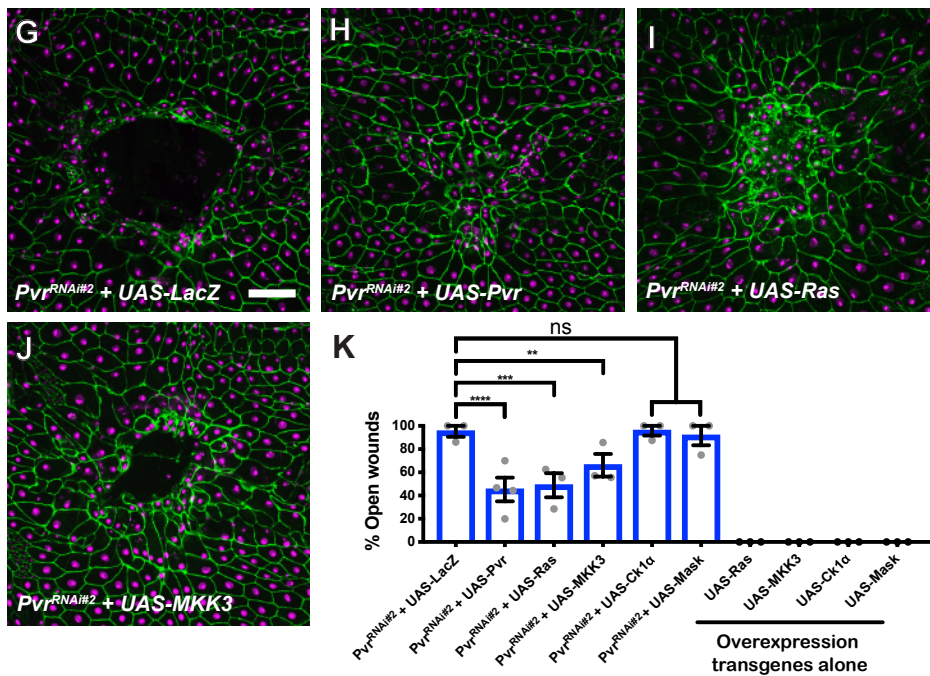

**Fig.5****A**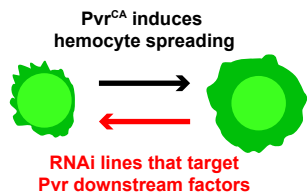**Hemocytes spreading in vitro****LifectGFP (F-actin)**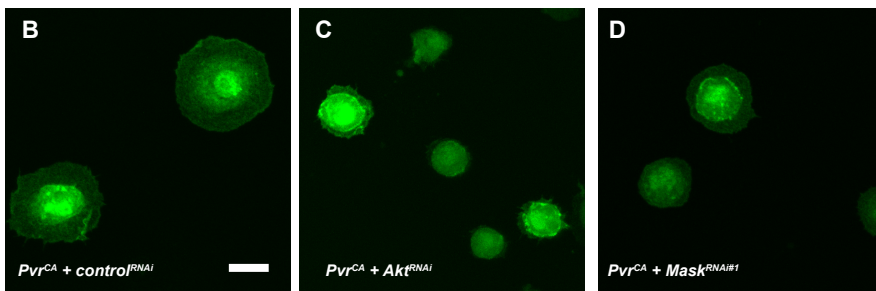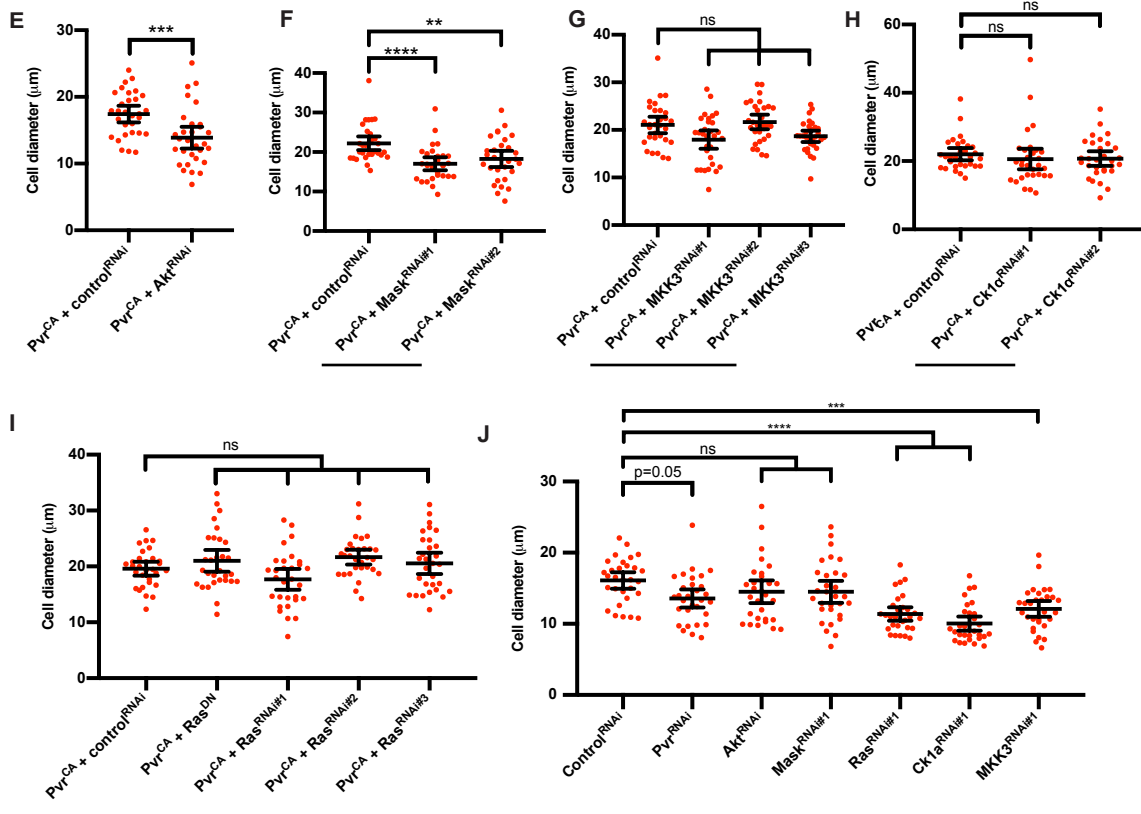

Fig.6

# Hemocytes at the wound (Scanning Electron Microscopy)

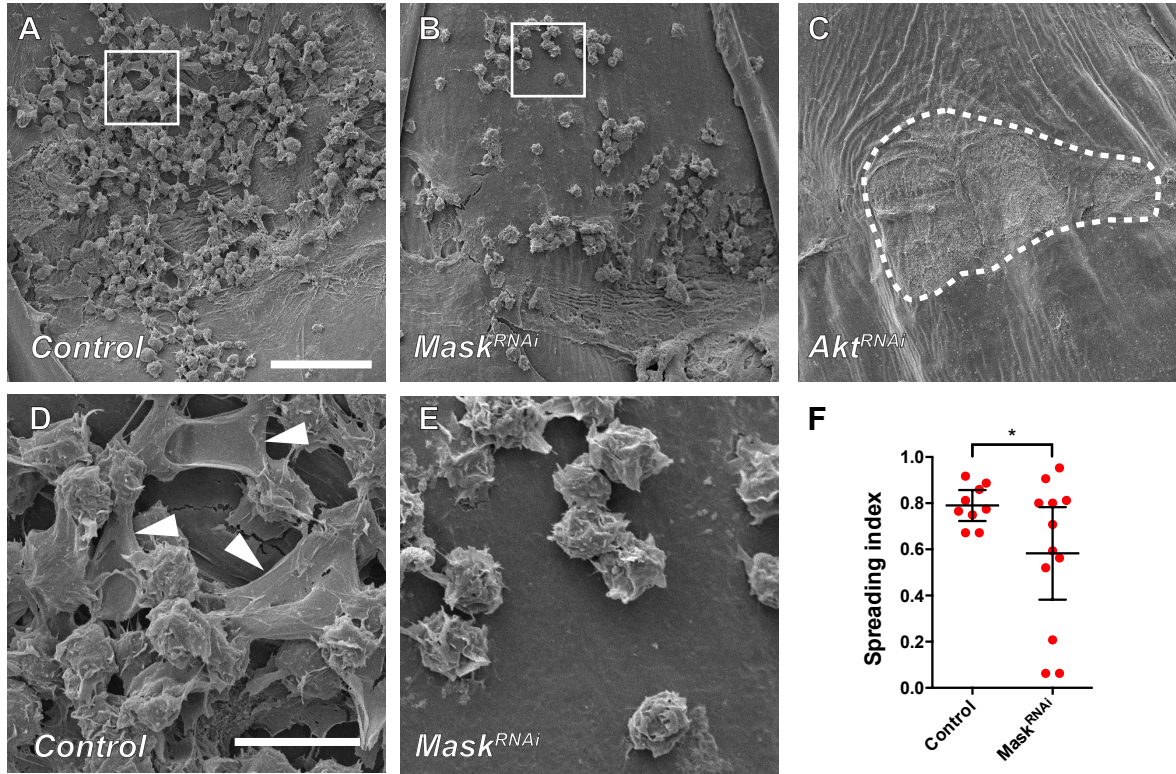

Fig.S1

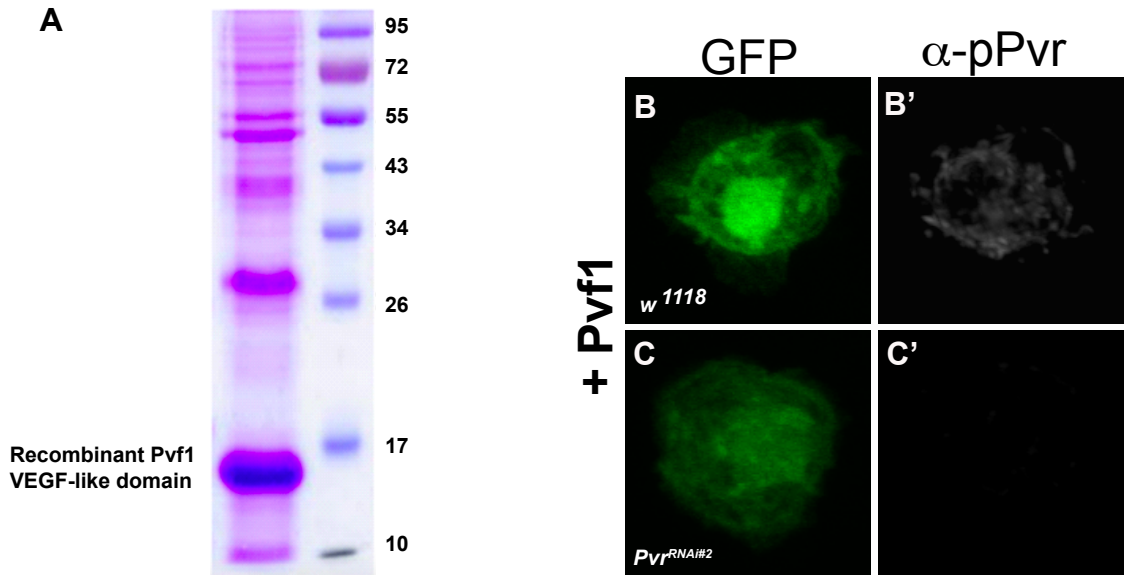

**Figure S1. Verification of expression and activity of enriched Pvf1.** (A) Enrichment of Pvf1 protein. Bacterial extract from cells overexpressing the Pvf1 VEGF-like domain (see methods). A large band at the expected MW of ~15 kD is observed. (B-C'). Hemocytes isolated from third instar larvae (genotype) +/- *UAS-Pvr<sup>RNAi#2</sup>* were plated for one hour, treated with enriched Pvf1 protein, and visualized with the *UAS-GFP* lineage marker (green) (B-C) or immunostained with anti-phospho-Pvr (white) (B'-C'). Only control hemocytes lacking the *UAS-Pvr<sup>RNAi#2</sup>* transgene show anti-phospho-Pvr staining upon addition of Pvf1.

### Supplemental Table 1. Flies used in this study

Please note the genotype of sex chromosome is simplified. The actual genotypes for the sex chromosome could be mixed, depending on the source RNAi collection, UAS transgenes, and larvae of both sexes were pooled and tested.

Fig. panels – genotypes tested:

#### Fig. 1.

(B)  $w^{1118}$  control.

(C)  $Pvr^{null/hypo}$ .

(D)  $Pvf3^{null}$ .

(E)  $Pvf2^{hypo}$ .

(F)  $Pvf1^{null}$ .

(G)  $w^{1118}$  control.

(H)  $Pvf1^{null}$ .

(I)  $w^{1118}, Pvf1^{null}$ .

#### Fig. 2.

(B)  $hml\Delta-Gal4, UAS-GFP/+$ .

(C)  $hml\Delta-Gal4, UAS-GFP/UAS-Pvr^{RNAi\#2}$ .

(D)  $hml\Delta Gal4, UAS-LifeActGFP/+; UAS-Luciferase^{RNAi}/+$ .

(E)  $hml\Delta Gal4, UAS-LifeActGFP/+; UAS-Pvr^{CA}/UAS-Luciferase^{RNAi}$ .

(F)  $hml\Delta Gal4, UAS-LifeActGFP/+, UAS-Pvr^{CA}/UAS-Pvr^{RNAi\#1}$ .

(G) as (D-F).

(H)  $hml\Delta Gal4, UAS-LifeActGFP/UAS-LacZ$  and  $hml\Delta Gal4, UAS-LifeActGFP/UAS-Pvr^{CA}$ .



**Fig. 3.** Genotypes are indicated in the figure.

**Fig. 4.**

- (A) *e22c-Gal4, UAS-dsRed2Nuc, UAS-src-GFP/+; UAS-Luciferase<sup>RNAi</sup>/+*.
- (B) *e22c-Gal4, UAS-dsRed2Nuc, UAS-src-GFP/+; UAS-Pvr<sup>RNAi#1</sup>/+*.
- (C) *e22c-Gal4, UAS-dsRed2Nuc, UAS-src-GFP/UAS-Ras<sup>RNAi#1</sup>*.
- (D) *e22c-Gal4, UAS-dsRed2Nuc, UAS-src-GFP/+; UAS-Mask<sup>RNAi#1</sup>/+*.
- (E) *e22c-Gal4, UAS-dsRed2Nuc, UAS-src-GFP/UAS-MKK3<sup>RNAi#2</sup>*.
- (F) as (A-E).
- (G) *UAS-LacZ/UAS-Pvr<sup>RNAi#2</sup>; A58-Gal4, UAS-dsRed2Nuc, UAS-src-GFP/+*.
- (H) *UAS-Pvr/UAS-Pvr<sup>RNAi#2</sup>; A58-Gal4, UAS-dsRed2Nuc, UAS-src-GFP/+*.
- (I) *UAS-Ras/UAS-Pvr<sup>RNAi#2</sup>; A58-Gal4, UAS-dsRed2Nuc, UAS-src-GFP/+*.
- (J) *UAS-MKK3/+ or Y; UAS-Pvr<sup>RNAi#2</sup>/+; A58-Gal4, UAS-dsRed2Nuc, UAS-src-GFP/+*.
- (K) as (G-J).

**Fig. 5.**

- (B) *hml Δ-Gal4, UAS-LifeactGFP/+; UAS-Pvr<sup>CA</sup>/UAS-Luciferase<sup>RNAi</sup>*.
- (C) *hml Δ-Gal4, UAS-LifeactGFP/+; UAS-Pvr<sup>CA</sup>/UAS-Akt<sup>RNAi</sup>*.
- (D) *hml Δ-Gal4, UAS-LifeactGFP/+; UAS-Pvr<sup>CA</sup>/UAS-Mask<sup>RNAi#1</sup>*.
- (E) as (B) and (C).
- (F)
- *hml Δ-Gal4, UAS-LifeactGFP/+; UAS-Pvr<sup>CA</sup>/UAS-Luciferase<sup>RNAi</sup>*.
  - *hml Δ-Gal4, UAS-LifeactGFP; UAS-Pvr<sup>CA</sup>/UAS-Mask<sup>RNAi#1</sup>*.

- *hml Δ-Gal4, UAS-LifeactGFP/ UAS-Mask<sup>RNAi#2</sup>; UAS-Pvr<sup>CA</sup>/+*.

(G)

- *hml Δ-Gal4, UAS-LifeactGFP/+; UAS-Pvr<sup>CA</sup>/UAS-Luciferase<sup>RNAi</sup>.*
- *hml Δ-Gal4, UAS-LifeactGFP/UAS-MKK3<sup>RNAi#1, #2, or #3</sup>; UAS-Pvr<sup>CA</sup>/+*.

(H)

- *hml Δ-Gal4, UAS-LifeactGFP/+; UAS-Pvr<sup>CA</sup>/UAS-Luciferase<sup>RNAi</sup>.*
- *hml Δ-Gal4, UAS-LifeactGFP; UAS-Pvr<sup>CA</sup>/UAS-Ckl1<sup>RNAi#1 or #2</sup>.*

(I)

- *hml Δ-Gal4, UAS-LifeactGFP/+; UAS-Pvr<sup>CA</sup>/UAS-Luciferase<sup>RNAi</sup>.*
- *UAS-Ras<sup>DN/+</sup> or Y; hml Δ-Gal4, UAS-LifeactGFP/+; UAS-Pvr<sup>CA</sup>/+*
- *hml Δ-Gal4, UAS-LifeactGFP/ UAS-Ras<sup>RNAi#1</sup>; UAS-Pvr<sup>CA</sup>*
- *hml Δ-Gal4, UAS-LifeactGFP/+; UAS-Pvr<sup>CA</sup>/UAS-Ras<sup>RNAi#2, or #3</sup>*

(J)

- *hml Δ-Gal4, UAS-LifeactGFP/+; UAS-Luciferase<sup>RNAi/+</sup>.*
- *hml Δ-Gal4, UAS-LifeactGFP/+; UAS-Pvr<sup>RNAi#1/+</sup>.*
- *hml Δ-Gal4, UAS-LifeactGFP/+; UAS-Akt<sup>RNAi/+</sup>.*
- *hml Δ-Gal4, UAS-LifeactGFP/+; UAS-Mask<sup>RNAi#1/+</sup>.*
- *hml Δ-Gal4, UAS-LifeactGFP/UAS-Ras<sup>RNAi#1</sup>.*
- *hml Δ-Gal4, UAS-LifeactGFP/+; UAS-Ckl1<sup>RNAi#1/+</sup>.*
- *hml Δ-Gal4, UAS-LifeactGFP/UAS-MKK3<sup>RNAi#1</sup>.*

**Fig. 6.**

(A,D) *hml Δ-Gal4, UAS-LifeactGFP/+; UAS-Luciferase<sup>RNAi/+</sup>.*



(B,E) *hml*  $\Delta$ -*Gal4*, *UAS-LifeactGFP*/+; *UAS-Mask*<sup>RNAi#1</sup>/+.

(C) *hml*  $\Delta$ -*Gal4*, *UAS-LifeactGFP*/+; *UAS-Akt*<sup>RNAi</sup>/+.

(F) as (A) and (B).

**Fig. S1.**

(B,B') *w*<sup>1118</sup>; *hml*  $\Delta$ -*Gal4*, *UAS-GFP*

(C,C') *hml*  $\Delta$ -*Gal4*, *UAS-GFP*/*UAS-Pvr*<sup>RNAi#2</sup>.
